# Supplementary material for: Human Tregs at the materno-fetal interface show site-specific adaptation reminiscent of tumor Tregs
Source: PubMed Central journal article supplement (PMC7526557; doi:10.1172/jci.insight.137926), 2020-09-17
Supplement: jciinsight-5-137926-s091.pdf [file jciinsight-5-137926-s091.pdf]

## Supplementary Materials

- Fig. S1. uTregs derived from the maternal-fetal interface are bona fide maternal Tregs.
- Fig. S2. Enrichment of gene signatures of *in vitro* activated Tregs.
- Fig. S3. Tregs at the maternal-fetal interface share transcriptional adaptation with uTconv.
- Fig. S4. uTregs from the maternal-fetal interface share similarities were human Tregs from healthy tissue sites.
- Fig. S5. uTregs from the incision site are bona fide Tregs and have a tissue-resident profile.
- Table S1. Clinical characteristics of 20 human subjects undergoing caesarian section.
- Table S2. Antibodies used for sorting and flow cytometric analysis.
- Table S3. Gene signatures used for gene set enrichment analysis and overlap with uTreg signature.
- Table S4. Upregulated genes in the uTreg-specific core signature.
- Table S5. Downregulated genes in the uTreg-specific core signature.
- Table S6. Overlap of tumor-infiltrating Treg signatures with significantly upregulated genes in uTregs vs bTregs (% of overlapping genes/genes in signature).
- Table S7. Genes most often shared between 7 tumor-infiltrating Treg signatures.

**Fig. S1. uTregs derived from the maternal-fetal interface are bona fide maternal Tregs.**

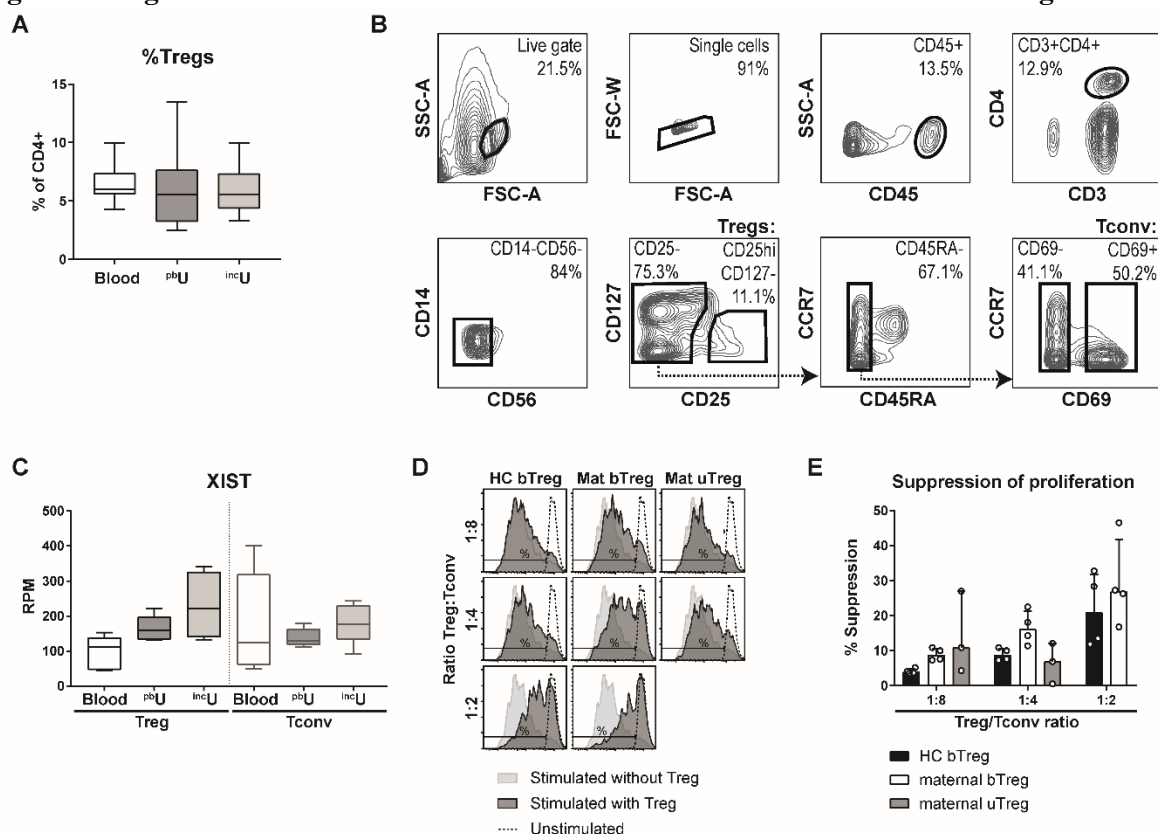

(A) Ex vivo frequency of CD25<sup>+</sup>FOXP3<sup>+</sup> cells among CD4<sup>+</sup> T cells from blood, maternal-fetal interface (pbU) and incision site (incU). (B) Sorting strategy for uTregs and uTconv in the uterus. (C) Expression of female-specific gene XIST in all sorted T cell subsets. (D+E) Suppression assay assessing proliferation of healthy CD4<sup>+</sup> T cells by CellTrace Violet dilution assay, after 4 days of coculture with healthy donor bTregs, maternal bTregs, or uTregs at a 1:8, 1:4 and 1:2 ratio (n=4).

**Fig. S2. Enrichment of gene signatures of *in vitro* activated Tregs.**

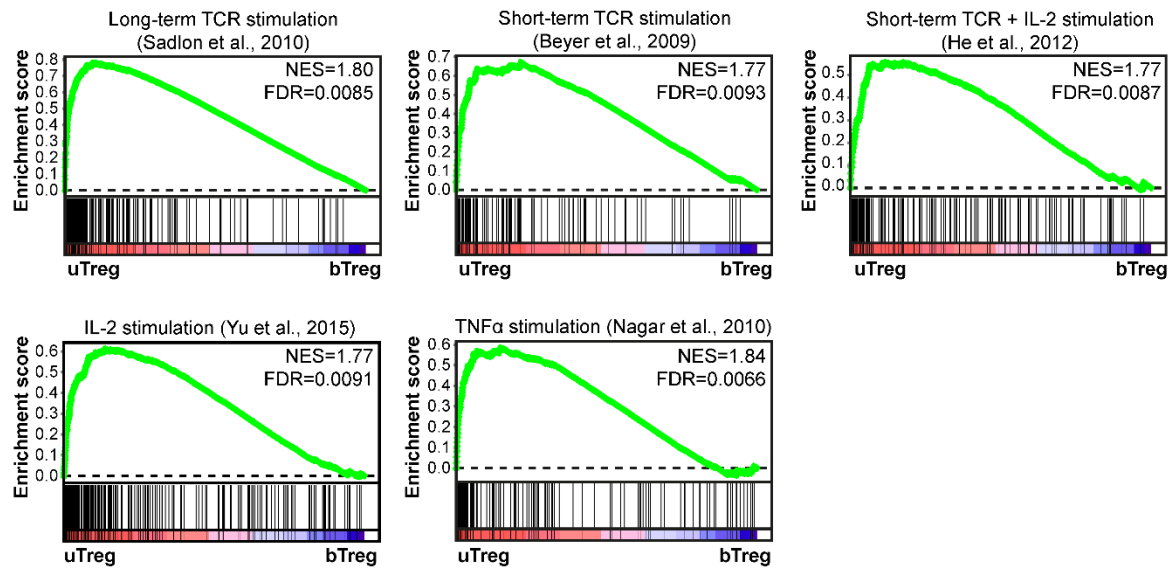

Gene set enrichment analysis with genes upregulated in Tregs stimulated *in vitro* with TCR stimulation, IL-2 or TNF $\alpha$ , comparing uTregs and bTregs. (81–85) NES = normalized enrichment score.

**Fig. S3. Tregs at the maternal-fetal interface share transcriptional adaptation with uTconv.**

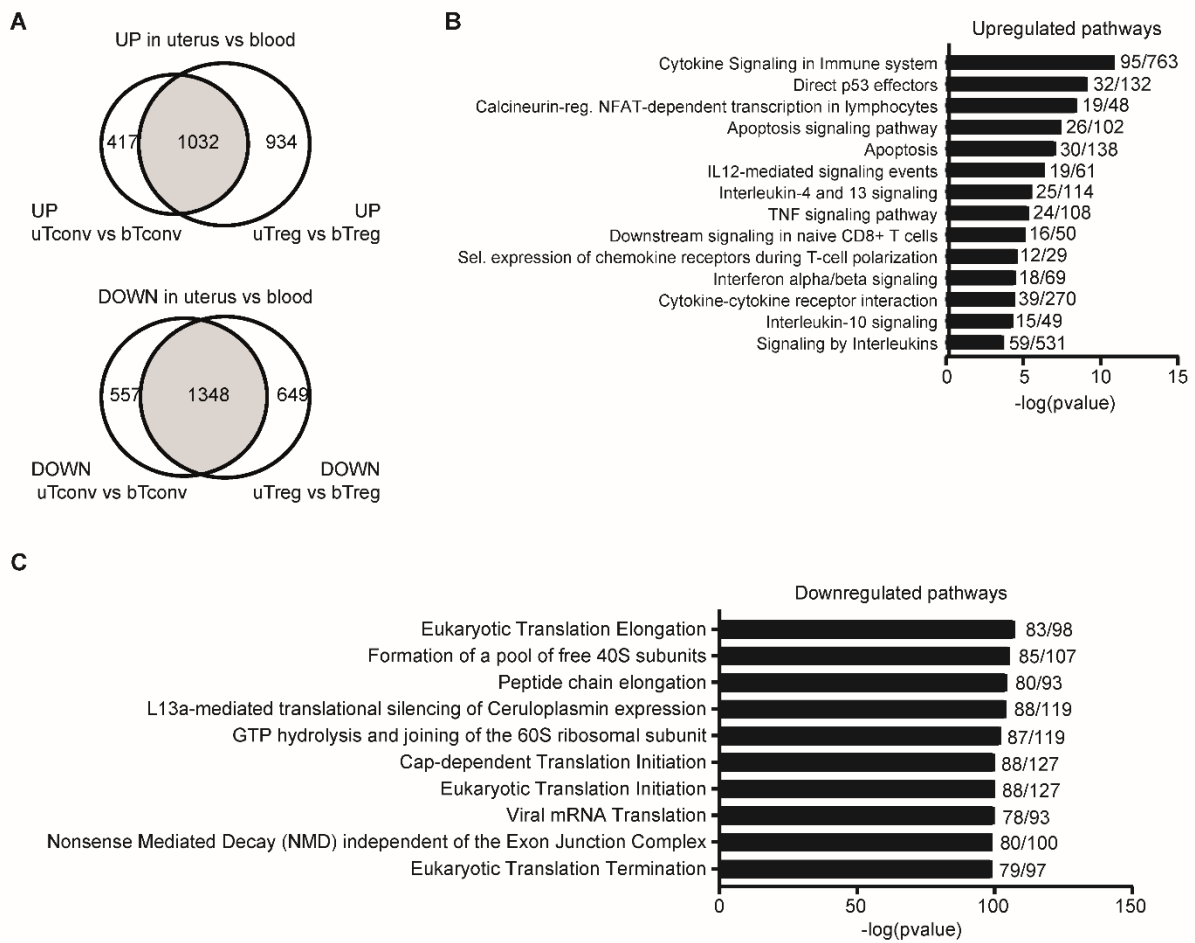

(A) Venn diagrams of upregulated and downregulated genes ( $p_{adj} < 0.05$  and  $|\text{Log}_2\text{FC}| > 0.05$ ) shared between Tregs and  $\text{CD}4^+$  Tconv from the maternal-fetal interface, compared to their blood-derived counterparts. (B) Pathway analysis (ToppGene pathways) of the 1032 shared upregulated genes in uTreg and uTconv. P-values  $< 0.05$  after Bonferroni correction were considered significant. Pathway analysis (ToppGene Suite) of downregulated pathways shared among uTreg and uTconv. P-values  $< 0.05$  after Bonferroni correction were considered significant.

**Fig. S4. uTregs from the maternal-fetal interface share similarities with human Tregs from healthy tissue sites.**

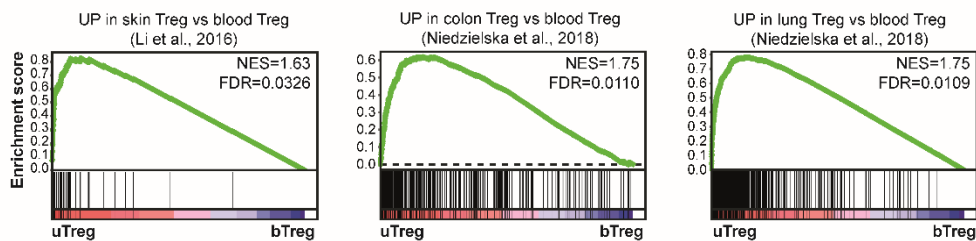

Gene set enrichment analysis with published genes which are significantly upregulated in tissue Tregs from healthy skin(15), colon(14) or lung(14) compared to blood Tregs, in uTregs versus bTregs.

**Fig. S5. uTregs from the incision site are bona fide Tregs and have a tissue-resident profile.**

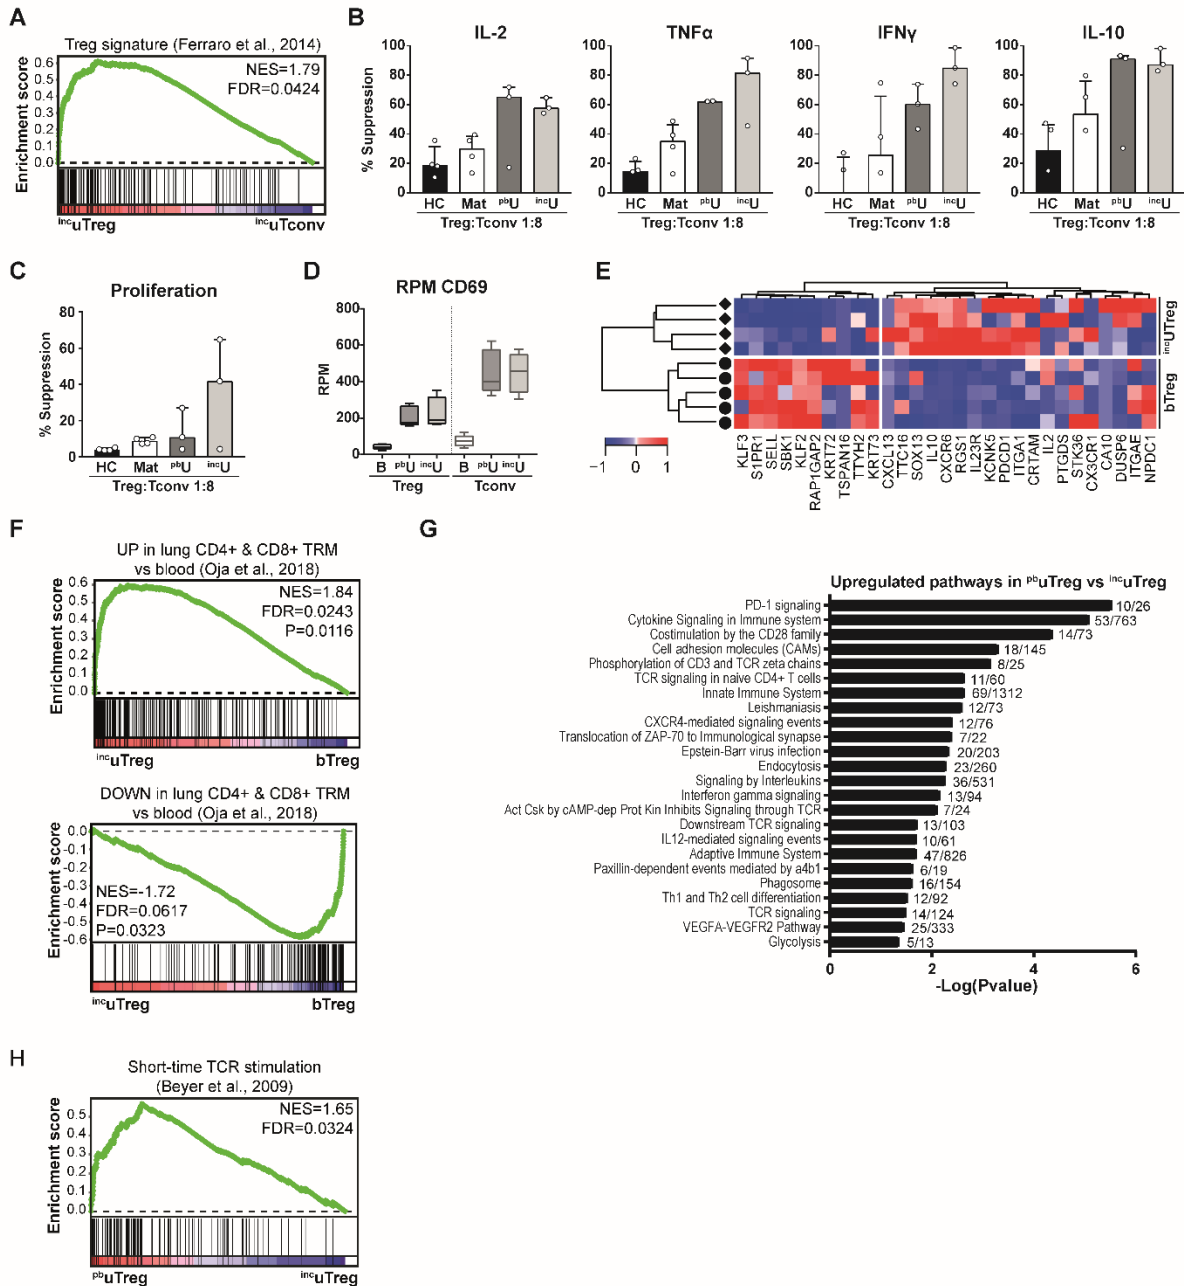

(A) GSEA with published Treg signature gene set comparing *incuTreg* and *incuTconv*. (71) (B+C) Suppression assay assessing proliferation of anti-CD3 stimulated (or unstimulated) healthy CD4<sup>+</sup> T cells by CellTrace Violet dilution assay (C) and cytokine production in the supernatant by multiplex immunoassay (B), after 4 days of coculture with healthy donor bTregs, maternal bTregs, or uTregs at a 1:8, 1:4 and 1:2 ratio. (D) Gene expression of CD69. (E) Heatmap with published human core tissue-resident genes(4) in *incuTreg*s vs bTregs (F). Gene set enrichment analysis (GSEA) with published genes identifying human lung CD4<sup>+</sup> and CD8<sup>+</sup> TRM compared to blood memory cells; left panel(86)) and genes upregulated in skin CD4<sup>+</sup> TRM compared to blood CD4<sup>+</sup> T cells (right panel(15)), in *incuTreg*s vs bTregs. NES = normalized enrichment score. (G) Pathway analysis (ToppGene Suite) with 558 genes upregulated in *pbuTreg*s vs *incuTreg*s. P-values<0.05 after Bonferroni correction were considered significant. (H) GSEA with gene set of upregulated genes in *in vitro* stimulated Tregs.(85) NES = normalized enrichment score.

**Table S1. Clinical characteristics of 20 human subjects undergoing caesarian section.**

| <b>Maternal characteristics</b>                          |            |
|----------------------------------------------------------|------------|
| Age (years), <i>mean (st.dev)</i>                        | 34 (2.3)   |
| White ethnicity, <i>n (%)</i>                            | 19 (95%)   |
| Gravida (n), <i>mean (st.dev)</i>                        | 2.3 (1.0)  |
| Para (n), <i>mean (st.dev)</i>                           | 1.0 (0.7)  |
| Nulliparous, <i>n (%)</i>                                | 4 (20%)    |
| Pregravid BMI (kg/m <sup>2</sup> ), <i>mean (st.dev)</i> | 24.4 (5.2) |
| <b>Neonatal characteristics</b>                          |            |
| Gestation age at birth (days), <i>mean (st.dev)</i>      | 275 (5)    |
| Birthweight (grams), <i>mean (st.dev)</i>                | 3535 (480) |
| Birthweight (percentile), <i>mean (st.dev)</i>           | 60 (30)    |
| FGR (birthweight <p10), <i>n (%)</i>                     | 0 (0%)     |
| LGA (birthweight >p95), <i>n (%)</i>                     | 2 (10%)    |
| Male sex, <i>n (%)</i>                                   | 6 (30%)    |
| Apgar at 5 min post partum, <i>mean (st.dev)</i>         | 8.7 (0.8)  |
| Apgar at 10 min post partum, <i>mean (st.dev)</i>        | 9.6 (0.9)  |

**Table S2. Antibodies used for sorting and flow cytometric analysis**

| <b>Cell sorting</b>                       |                     |              |                     |                   |                     |
|-------------------------------------------|---------------------|--------------|---------------------|-------------------|---------------------|
| <i>Antibody</i>                           | <i>Fluorochrome</i> | <i>Clone</i> | <i>Dilution (x)</i> | <i>Catalog no</i> | <i>Company</i>      |
| CD69                                      | FITC                | FN50         | 25                  | 130-113-523       | Miltenyi            |
| CCR7                                      | PE                  | 3D12         | 25                  | 12-1979-42        | eBioscience         |
| CD4                                       | PerCP-Cy5.5         | RPA-T4       | 200                 | 2102650           | Sony Biotechnology  |
| CD25                                      | PE-Cy7              | M-A251       | 25                  | 557741            | BD                  |
| CD127                                     | AF647               | HCD127       | 50                  | 2356590           | Sony Biotechnology  |
| CD14                                      | APC-Cy7             | MphiP9       | 200                 | 557831            | BD                  |
| CD56?                                     | PE-CF594            | B159         |                     | 562289            | BD                  |
| CD45RA                                    | PacBlue             | HI100        | 200                 | 2120590           | Sony Biotechnology  |
| CD3                                       | BV510               | OKT3         | 200                 | 317332            | Biologend           |
| CD45RA                                    | BV711               | HI30         | 400                 | 304050            | Biologend           |
| <b>Flow cytometry</b>                     |                     |              |                     |                   |                     |
| <i>Surface antibody</i>                   | <i>Fluorochrome</i> | <i>Clone</i> | <i>Dilution (x)</i> | <i>Catalog no</i> | <i>Company</i>      |
| CCR5                                      | FITC                | 2D7/CCR5     | 25                  | 555992            | BD                  |
| CCR8                                      | PE                  | L263G8       | 100                 | 360603            | Biologend           |
| CD134 (OX-40)                             | PerCP-Cy5.5         | Ber-ACT35    | 50                  | 350010            | Biologend           |
| CD137 (4-1BB)                             | APC                 | 4B4-1        | 50                  | 550890            | BD                  |
| CD14                                      | V500                | M5E2         | 100                 | 561391            | BD                  |
| CD25                                      | BV711               | 2A3          | 50                  | 563159            | BD                  |
| CD3                                       | APC-eF780           | UCHT1        | 400                 | 47-0038-42        | eBioscience         |
| CD4                                       | PE-Cy5              | RPA-T4       | 50                  | 555348            | BD                  |
| CD56                                      | BV510               | HCD56        | 50                  | 2191700           | Sony Biotechnology  |
| CD69                                      | PE-Cy7              | FN50         | 50                  | 557745            | BD                  |
| CXCR3                                     | BV605               | G025H7       | 12.5                | 2368640           | Sony Biotechnology  |
| CXCR5                                     | PerCP-Cy5.5         | TG2/CXCR5    | 200                 | TG2/CXCR5         | AntibodyChain       |
| GITR                                      | FITC                | #110416      | 25                  | FAB689F           | R&D                 |
| HLA-DR                                    | PerCP-Cy5.5         | L243         | 100                 | 307630            | Biologend           |
| ICOS                                      | APC                 | ISA3         | 25                  | 17-9948-42        | eBioscience         |
| IL18R1                                    | FITC                | H44          | 12.5                | 11-7183-42        | eBioscience         |
| PD-1                                      | APC                 | MIH4         | 12.5                | 558694            | BD                  |
| TIGIT                                     | PerCP-eF710         | MBSA43       | 50                  | 46-9200-42        | eBioscience         |
| <i>Intracellular antibody</i>             | <i>Fluorochrome</i> | <i>Clone</i> | <i>Dilution (x)</i> | <i>Catalog no</i> | <i>Company</i>      |
| CTLA-4                                    | PE                  | BNI3         | 12.5                | 555853            | BD                  |
| FOXP3                                     | eFluor450           | PCH101       | 50                  | 48-4776-42        | eBioscience         |
| Ki67                                      | AF647               | B56          | 200                 | 558615            | BD                  |
| ROR $\gamma$ t                            | APC                 | AFKJS-9      | 200                 | 17-6988-82        | eBioscience         |
| T-bet                                     | PE-CF594            | O4-46        | 25                  | 562467            | BD                  |
| <i>eBioscience™ Fixable Viability Dye</i> | <i>eFluor506</i>    |              | <i>300</i>          | <i>65-0866-14</i> | <i>ThermoFisher</i> |

**Table S3. Gene signatures used for gene set enrichment analysis and overlap with uTreg signature**

| Figure      | Reference                |          | Geneset origin |                                                                                                                                            | Criteria for geneset |                         |        |                                                                                                                       |
|-------------|--------------------------|----------|----------------|--------------------------------------------------------------------------------------------------------------------------------------------|----------------------|-------------------------|--------|-----------------------------------------------------------------------------------------------------------------------|
|             | Author, year             | GEO NCBI | Organism       | Tissue compartment                                                                                                                         | Publ/GEO2R           | Pvalue/Padj             | FC     | Comparison                                                                                                            |
| 1BC, S5A    | Ferraro et al., 2014     | -        | Human          | Peripheral blood                                                                                                                           | Publication          |                         |        | Treg signature vs Tconv                                                                                               |
| 1I          | Joller et al., 2014      | -        | Mouse          | Spleen                                                                                                                                     | Publication          | P<0.05                  | FC>2   | TIGIT+ vs TIGIT- Tregs                                                                                                |
| 4B, S5E     | Kumar et al., 2017       | GSE94964 | Human          | Lung and spleen                                                                                                                            | Publication          | Padj<0.05               |        | CD69+ vs CD69- (shared among CD4+ and CD8+ from lung and spleen)                                                      |
| S4          | Niedzielska et al., 2018 | -        | Human          | Colon & lung vs peripheral blood                                                                                                           | Publication          | Padj<0.05               | L2FC>2 | Lung/Colon CD4+ vs blood CD4+                                                                                         |
| 4C          | Li et al., 2016          | GSE74158 | Human          | Skin vs peripheral blood                                                                                                                   | GEO2R                | Padj<0.05               |        | Skin CD4+ vs blood CD4+                                                                                               |
| 4C, S5F     | Oja et al., 2018         | -        | Human          | Lung vs peripheral blood                                                                                                                   | Publication          | Padj<0.05               |        | Shared between lung CD4+ and CD8+ TRM vs Blood TEM                                                                    |
| 5J          | Tan et al., 2016         | -        | Mouse          | Pancreas prediabetic T1D mice vs spleen                                                                                                    | Publication          | <0.05                   | FC>2   | Splenic CXCR3+ versus CXCR3- Tregs (Tbet+)                                                                            |
| 6ABC        | Dispirito et al., 2018   | -        | Mouse          | VAT, muscle, Colon vs spleen                                                                                                               | Publication          | <0.05                   | FC>2   | VAT/muscle/colon Tregs vs spleen Tregs                                                                                |
| 6DE,7AB     | Plitas et al., 2016      | -        | Human          | Breast cancer vs breast parenchyma vs peripheral blood                                                                                     | Publication          | Padj<0.05               |        | UP in breast cancer Treg vs breast cancer Tconv AND UP in breast cancer Treg vs Blood Treg                            |
| 6DE,7AB     | Toker et al., 2018       | -        | Human          | Epithelial ovarian cancer (mostly high-grade serous) or melanoma                                                                           | Publication          | Padj<0.1                |        | PD1intICOShi population (Tregs) vs Tconv                                                                              |
| 6DE,7AB, 9D | Tirosh et al., 2016      | -        | Human          | Single cell melanoma                                                                                                                       | Publication          | <0.01 (CD4) <0.05 (CD8) | FC>2   | Meloma Treg vs CD4 Tconv and CD8 Tconv                                                                                |
| 6DE,7AB, 9D | Zheng et al., 2017       | -        | Human          | Hepatocellular carcinoma single cell seq                                                                                                   | Publ S3 Cluster      | Padj<0.05               | FC>2   | Genes specific for Treg cluster identified by single cell seq                                                         |
| 6DE,7AB, 9D | De Simone et al., 2016   | -        | Human          | Colon and lung cancer vs colon and lung parenchyma vs blood vs Tconv                                                                       | Publication          |                         |        | UP in TITR vs parenchyma vs blood vs Tconv                                                                            |
| 6DE,7AB, 9D | Pacella et al., 2018     | -        | Human          | Liver cirrhosis and tumor (CT) or from the peripheral blood (PB) of patients with chronic HCV infection and hepatocellular carcinoma (HCC) | Publication          |                         | FC>2   | Upregulated in Treg CT OX40+ versus Treg PB OX40-, and not in Treg CT OX40-, Treg PB OX40+ and all Tconv counterparts |
| 6DE,7AB, 9D | Magnuson et al., 2018    | -        | Human          | Colon cancer vs healthy colon                                                                                                              | Publication          |                         |        | Tumor-Treg specific in mouse and human and correlation with FOXP3 expression                                          |
| 6DF         | Li et al., 2016          | GSE74158 | Human          | Skin vs peripheral blood                                                                                                                   | GEO2R                | Padj<0.05               |        | UP in skin Treg vs skin Tconv AND UP in skin Treg vs Blood Treg                                                       |

**Table S3. Gene signatures used for gene set enrichment analysis and overlap with uTreg signature**

| Figure  | Reference                |          | Geneset origin |                                    | Criteria for geneset |             |                                 |                                                                                                                                                                       |
|---------|--------------------------|----------|----------------|------------------------------------|----------------------|-------------|---------------------------------|-----------------------------------------------------------------------------------------------------------------------------------------------------------------------|
|         | Author, year             | GEO NCBI | Organism       | Tissue compartment                 | Publ/GEO2R           | Pvalue/Padj | FC                              | Comparison                                                                                                                                                            |
| 6DF     | Niedzielska et al., 2018 | -        | Human          | Colon & lung vs peripheral blood   | Publication          | Padj<0.05   | L2FC>2                          | UP in lung/colong Treg vs lung/colon Tconv AND UP in lung/colon Treg vs Blood Treg                                                                                    |
| 7CD, 9E | Plitas et al., 2016      | -        | Human          | Breast cancer vs breast parenchyma | Publication          | Padj<0.05   |                                 | UP in Breast cancer Tregs vs healthy breast parenchyma Tregs                                                                                                          |
| 7CD, 9E | Magnuson et al., 2018    | -        | Human          | Colon cancer vs healthy colon      | Publication          |             |                                 | Mean overall fold change, or high fold change in at least two patients. Mean FoldChange > 2 and nominal p.value <0.02, or FoldChange >4 (UP), or <0.5 and <0.25 (DN). |
| S2      | Nagar et al., 2010       | GSE18893 | Human          | Peripheral blood                   | GEO2R                | P<0.05      | L2FC>0.5                        | 50ng/mL TNFa stim vs unstim sorted Tregs (2 and 24 hrs combined in GEO2R)                                                                                             |
| S2      | Yu et al., 2015          | GSE49817 | Human          | Peripheral blood                   | GEO2R                | Padj<0.05   | UP<br>FC>1.5,<br>DOWN<br>all FC | Sorted Treg stimulated with IL-2 24 hrs vs unstimulated Tregs                                                                                                         |
| S2      | He et al., 2012          | GSE11292 | Human          | Peripheral blood                   | GEO2R                | P<0.01      | FC>10                           | Sorted Treg stim with anti-CD3/CD28 and IL-2 for 3 hours vs unstimulated Tregs                                                                                        |
| S2      | Sadlon et al., 2010      | GSE20934 | Human          | Cord blood                         | GEO2R                | P<0.05      | FC>2                            | Cord blood Treg expanded with dynabeads for 8 days + PMA/ionomycin vs resting Tregs at day 4                                                                          |
| S2, S5H | Beyer et al., 2009       | GSE16835 | Human          | Peripheral blood                   | GEO2R                | Padj<0.05   | FC>3                            | Tregs undergoing short time stimulation with anti-CD3/CD28 vs ex vivo Treg                                                                                            |
| S4      | Li et al., 2016          | GSE74158 | Human          | Skin vs peripheral blood           | GEO2R                | Padj<0.05   |                                 | Skin Treg vs blood Treg                                                                                                                                               |
| S4      | Niedzielska et al., 2018 | -        | Human          | Colon & lung vs peripheral blood   | Publication          | Padj<0.05   | L2FC>2                          | Lung/Colon Treg vs blood Treg                                                                                                                                         |



**Table S4. Upregulated genes in the uTreg-specific core signature.**

| <i>Gene</i>       | uTreg core UP   |                 | UP vs bTreg     |               |             | UP vs uTconv    |               |             |
|-------------------|-----------------|-----------------|-----------------|---------------|-------------|-----------------|---------------|-------------|
|                   | <i>Ensembl</i>  | <i>baseMean</i> | <i>Log2(FC)</i> | <i>Pvalue</i> | <i>Padj</i> | <i>Log2(FC)</i> | <i>Pvalue</i> | <i>Padj</i> |
| <b>AC006064.4</b> | ENSG00000269968 | 153.4           | 1.22            | 1.09E-07      | 2.43E-06    | 0.75            | 9.81E-04      | 4.01E-02    |
| <b>AC017002.1</b> | ENSG00000240350 | 24.1            | 2.69            | 6.15E-09      | 1.78E-07    | 3.09            | 3.19E-11      | 2.93E-08    |
| <b>AC080038.1</b> | ENSG00000011028 | 5.4             | 3.80            | 1.31E-05      | 1.87E-04    | 3.12            | 6.80E-05      | 5.38E-03    |
| <b>AC126603.1</b> | ENSG00000258628 | 76.9            | 1.49            | 1.00E-09      | 3.39E-08    | 1.09            | 4.15E-06      | 5.25E-04    |
| <b>AC132825.2</b> | ENSG00000243655 | 163.7           | 0.89            | 5.90E-05      | 7.19E-04    | 0.73            | 8.51E-04      | 3.65E-02    |
| <b>AC147651.4</b> | ENSG00000237181 | 7.6             | 1.49            | 3.93E-04      | 3.73E-03    | 1.78            | 2.30E-05      | 2.23E-03    |
| <b>ACP5</b>       | ENSG00000102575 | 28.6            | 1.58            | 2.39E-05      | 3.21E-04    | 1.92            | 2.74E-07      | 5.31E-05    |
| <b>ADAMTS5</b>    | ENSG00000154736 | 13.3            | 2.94            | 2.54E-07      | 5.30E-06    | 2.21            | 1.78E-05      | 1.85E-03    |
| <b>ADPRH</b>      | ENSG00000144843 | 8.3             | 1.56            | 7.12E-05      | 8.48E-04    | 1.92            | 1.15E-06      | 1.81E-04    |
| <b>ADM1</b>       | ENSG00000130706 | 66.0            | 0.83            | 3.27E-04      | 3.20E-03    | 0.75            | 9.77E-04      | 4.00E-02    |
| <b>AGTRAP</b>     | ENSG00000177674 | 44.8            | 1.36            | 7.07E-09      | 2.01E-07    | 0.84            | 1.67E-04      | 1.10E-02    |
| <b>AK4</b>        | ENSG00000162433 | 5.6             | 4.35            | 6.96E-08      | 1.62E-06    | 1.91            | 4.74E-04      | 2.40E-02    |
| <b>AKIRIN2</b>    | ENSG00000135334 | 44.4            | 1.48            | 8.04E-07      | 1.51E-05    | 1.31            | 8.68E-06      | 1.02E-03    |
| <b>AL390719.1</b> | ENSG00000217801 | 15.6            | 1.55            | 2.11E-07      | 4.49E-06    | 1.05            | 7.25E-05      | 5.67E-03    |
| <b>ARHGAP11B</b>  | ENSG00000187951 | 13.7            | 1.33            | 2.30E-05      | 3.09E-04    | 0.97            | 8.87E-04      | 3.75E-02    |
| <b>ARID5B</b>     | ENSG00000150347 | 203.1           | 0.88            | 3.06E-06      | 5.11E-05    | 1.04            | 3.32E-08      | 1.06E-05    |
| <b>ARL3</b>       | ENSG00000138175 | 26.3            | 0.93            | 6.30E-04      | 5.58E-03    | 0.88            | 7.74E-04      | 3.39E-02    |
| <b>ASMTL</b>      | ENSG00000169093 | 29.1            | 0.73            | 4.78E-03      | 3.08E-02    | 0.84            | 1.10E-03      | 4.28E-02    |
| <b>ATP1B3</b>     | ENSG00000069849 | 166.3           | 1.01            | 7.06E-08      | 1.64E-06    | 0.73            | 7.58E-05      | 5.89E-03    |
| <b>ATP6V1B2</b>   | ENSG00000147416 | 79.2            | 0.87            | 3.09E-06      | 5.15E-05    | 0.60            | 9.05E-04      | 3.80E-02    |
| <b>B3GAT1</b>     | ENSG00000109956 | 8.9             | 3.45            | 1.28E-08      | 3.49E-07    | 3.19            | 2.59E-08      | 8.67E-06    |
| <b>B4GALT5</b>    | ENSG00000158470 | 43.0            | 1.38            | 4.06E-10      | 1.47E-08    | 1.07            | 3.57E-07      | 6.56E-05    |
| <b>BABAM2</b>     | ENSG00000158019 | 40.5            | 1.07            | 4.84E-05      | 6.05E-04    | 1.10            | 2.14E-05      | 2.14E-03    |
| <b>BATF</b>       | ENSG00000156127 | 130.8           | 2.52            | 5.88E-16      | 6.25E-14    | 2.33            | 4.39E-14      | 8.43E-11    |
| <b>BCL2L11</b>    | ENSG00000153094 | 37.1            | 0.94            | 4.88E-05      | 6.10E-04    | 1.42            | 1.11E-09      | 6.88E-07    |
| <b>BPGM</b>       | ENSG00000172331 | 18.7            | 1.47            | 6.12E-06      | 9.56E-05    | 1.32            | 2.40E-05      | 2.31E-03    |
| <b>BST2</b>       | ENSG00000130303 | 59.7            | 1.66            | 7.32E-12      | 3.62E-10    | 0.82            | 3.35E-04      | 1.85E-02    |
| <b>BTG3</b>       | ENSG00000154640 | 97.0            | 2.33            | 1.13E-21      | 2.79E-19    | 0.91            | 7.65E-05      | 5.92E-03    |
| <b>C15orf39</b>   | ENSG00000167173 | 14.3            | 1.01            | 2.49E-03      | 1.79E-02    | 1.24            | 1.78E-04      | 1.14E-02    |
| <b>CAMK1</b>      | ENSG00000134072 | 22.1            | 2.67            | 2.90E-15      | 2.75E-13    | 1.75            | 6.98E-09      | 3.01E-06    |
| <b>CAVIN3</b>     | ENSG00000170955 | 17.0            | 3.95            | 5.62E-08      | 1.33E-06    | 2.07            | 4.95E-04      | 2.46E-02    |
| <b>CCDC71L</b>    | ENSG00000253276 | 15.8            | 0.98            | 6.83E-03      | 4.13E-02    | 1.38            | 1.46E-04      | 9.89E-03    |
| <b>CCL3</b>       | ENSG00000277632 | 4.7             | 3.15            | 5.15E-05      | 6.40E-04    | 2.37            | 6.85E-04      | 3.11E-02    |
| <b>CCL3</b>       | ENSG00000278567 | 5.1             | 3.74            | 9.33E-06      | 1.39E-04    | 3.49            | 1.01E-05      | 1.16E-03    |
| <b>CCR1</b>       | ENSG00000163823 | 12.1            | 8.33            | 3.68E-16      | 4.06E-14    | 2.05            | 2.57E-05      | 2.43E-03    |
| <b>CD74</b>       | ENSG00000019582 | 1077.4          | 1.00            | 2.59E-04      | 2.62E-03    | 1.55            | 1.62E-08      | 5.90E-06    |
| <b>CD80</b>       | ENSG00000121594 | 4.0             | 3.26            | 2.86E-06      | 4.81E-05    | 3.41            | 5.52E-07      | 9.56E-05    |
| <b>CDKN1C</b>     | ENSG00000273707 | 13.9            | 2.64            | 5.31E-06      | 8.39E-05    | 1.89            | 3.50E-04      | 1.91E-02    |
| <b>CDKN2A</b>     | ENSG00000147889 | 52.1            | 2.47            | 8.83E-14      | 6.42E-12    | 1.10            | 5.31E-04      | 2.59E-02    |
| <b>CEBPB</b>      | ENSG00000172216 | 63.7            | 1.73            | 9.23E-12      | 4.48E-10    | 0.89            | 2.17E-04      | 1.32E-02    |
| <b>CFAP20</b>     | ENSG00000070761 | 85.8            | 1.21            | 3.41E-07      | 6.90E-06    | 0.87            | 1.62E-04      | 1.07E-02    |
| <b>CGA</b>        | ENSG00000135346 | 4.2             | 6.00            | 3.41E-07      | 6.90E-06    | 4.78            | 3.00E-06      | 4.19E-04    |
| <b>CHST11</b>     | ENSG00000171310 | 117.7           | 0.86            | 2.00E-05      | 2.75E-04    | 0.87            | 1.22E-05      | 1.36E-03    |
| <b>CHSY1</b>      | ENSG00000131873 | 39.9            | 1.12            | 1.22E-07      | 2.71E-06    | 0.75            | 1.95E-04      | 1.22E-02    |
| <b>COL9A2</b>     | ENSG00000049089 | 10.0            | 3.83            | 3.30E-10      | 1.22E-08    | 2.68            | 7.45E-07      | 1.26E-04    |
| <b>COMT</b>       | ENSG00000093010 | 62.9            | 0.90            | 9.89E-08      | 2.23E-06    | 0.82            | 5.96E-07      | 1.02E-04    |
| <b>COX17</b>      | ENSG00000138495 | 95.7            | 0.90            | 2.08E-06      | 3.61E-05    | 0.76            | 4.03E-05      | 3.52E-03    |
| <b>CRADD</b>      | ENSG00000169372 | 6.6             | 2.29            | 3.04E-05      | 3.96E-04    | 1.95            | 1.28E-04      | 8.97E-03    |
| <b>CSF1</b>       | ENSG00000184371 | 48.9            | 3.53            | 4.64E-22      | 1.22E-19    | 1.33            | 5.67E-05      | 4.59E-03    |
| <b>CTLA4</b>      | ENSG00000163599 | 91.2            | 1.89            | 3.58E-09      | 1.09E-07    | 2.84            | 1.39E-18      | 5.85E-15    |
| <b>CTNNA1</b>     | ENSG00000044115 | 22.5            | 1.39            | 2.76E-07      | 5.70E-06    | 0.83            | 8.39E-04      | 3.62E-02    |
| <b>CTSC</b>       | ENSG00000109861 | 155.9           | 2.06            | 1.81E-16      | 2.11E-14    | 1.28            | 1.93E-07      | 4.08E-05    |
| <b>CXCR6</b>      | ENSG00000172215 | 65.7            | 3.97            | 9.30E-28      | 4.08E-25    | 1.34            | 4.86E-05      | 4.11E-03    |
| <b>CXorf40A</b>   | ENSG00000197620 | 33.9            | 0.96            | 8.49E-06      | 1.27E-04    | 0.98            | 2.66E-06      | 3.75E-04    |
| <b>CXorf40B</b>   | ENSG00000197021 | 22.0            | 0.98            | 3.29E-04      | 3.22E-03    | 1.26            | 3.42E-06      | 4.55E-04    |
| <b>DNAJC12</b>    | ENSG00000108176 | 7.3             | 2.82            | 3.85E-05      | 4.92E-04    | 2.13            | 8.35E-04      | 3.61E-02    |
| <b>DPYSL2</b>     | ENSG00000092964 | 37.6            | 1.04            | 5.08E-04      | 4.65E-03    | 1.42            | 2.10E-06      | 3.07E-04    |
| <b>DUSP10</b>     | ENSG00000143507 | 32.9            | 2.91            | 2.01E-25      | 7.34E-23    | 1.13            | 8.16E-07      | 1.37E-04    |
| <b>DYNLL1</b>     | ENSG00000088986 | 347.0           | 0.92            | 4.14E-06      | 6.68E-05    | 0.70            | 4.83E-04      | 2.43E-02    |

**Table S4. Upregulated genes in the uTreg-specific core signature.**

| <i>Gene</i>     | uTreg core UP   |                 | UP vs bTreg     |               |             | UP vs uTconv    |               |             |
|-----------------|-----------------|-----------------|-----------------|---------------|-------------|-----------------|---------------|-------------|
|                 | <i>Ensembl</i>  | <i>baseMean</i> | <i>Log2(FC)</i> | <i>Pvalue</i> | <i>Padj</i> | <i>Log2(FC)</i> | <i>Pvalue</i> | <i>Padj</i> |
| <b>EIF2AK3</b>  | ENSG00000172071 | 11.5            | 1.65            | 3.04E-06      | 5.08E-05    | 1.01            | 1.02E-03      | 4.06E-02    |
| <b>ELL2</b>     | ENSG00000118985 | 12.2            | 2.11            | 5.86E-06      | 9.19E-05    | 1.40            | 1.17E-03      | 4.55E-02    |
| <b>ENO1</b>     | ENSG00000074800 | 971.5           | 1.54            | 1.27E-11      | 5.98E-10    | 0.74            | 1.08E-03      | 4.24E-02    |
| <b>ENTPD1</b>   | ENSG00000138185 | 72.2            | 0.50            | 2.68E-03      | 1.91E-02    | 0.88            | 1.39E-07      | 3.13E-05    |
| <b>ERII</b>     | ENSG00000104626 | 26.5            | 1.43            | 6.70E-09      | 1.91E-07    | 1.03            | 9.45E-06      | 1.10E-03    |
| <b>ETS2</b>     | ENSG00000157557 | 17.9            | 2.36            | 1.88E-07      | 4.04E-06    | 2.21            | 4.31E-07      | 7.77E-05    |
| <b>ETV7</b>     | ENSG00000010030 | 27.6            | 1.40            | 4.05E-05      | 5.16E-04    | 1.56            | 3.97E-06      | 5.05E-04    |
| <b>EVA1B</b>    | ENSG00000142694 | 12.9            | 1.21            | 1.54E-03      | 1.19E-02    | 1.62            | 2.69E-05      | 2.53E-03    |
| <b>FABP5</b>    | ENSG00000164687 | 21.0            | 1.72            | 2.55E-06      | 4.35E-05    | 1.66            | 3.21E-06      | 4.34E-04    |
| <b>FAM3C</b>    | ENSG00000196937 | 13.2            | 2.39            | 7.45E-11      | 3.09E-09    | 1.56            | 1.21E-06      | 1.88E-04    |
| <b>FGL2</b>     | ENSG00000127951 | 13.2            | 1.50            | 7.55E-06      | 1.14E-04    | 1.24            | 8.51E-05      | 6.52E-03    |
| <b>FKBP1A</b>   | ENSG00000088832 | 236.1           | 0.94            | 1.02E-05      | 1.49E-04    | 0.81            | 1.26E-04      | 8.83E-03    |
| <b>FKBP1C</b>   | ENSG00000198225 | 18.5            | 0.95            | 3.00E-04      | 2.98E-03    | 1.29            | 9.63E-07      | 1.58E-04    |
| <b>FOXB1</b>    | ENSG00000171956 | 3.2             | 2.44            | 8.75E-04      | 7.40E-03    | 3.48            | 1.26E-05      | 1.40E-03    |
| <b>FUCA2</b>    | ENSG00000001036 | 19.3            | 1.52            | 2.65E-07      | 5.51E-06    | 0.97            | 3.56E-04      | 1.92E-02    |
| <b>GADD45A</b>  | ENSG00000116717 | 36.1            | 2.38            | 1.94E-09      | 6.19E-08    | 1.84            | 1.71E-06      | 2.60E-04    |
| <b>GADD45G</b>  | ENSG00000130222 | 17.4            | 6.43            | 1.48E-15      | 1.47E-13    | 1.88            | 3.63E-06      | 4.70E-04    |
| <b>GAPDH</b>    | ENSG0000011640  | 955.4           | 1.30            | 1.20E-09      | 4.00E-08    | 0.76            | 3.52E-04      | 1.91E-02    |
| <b>GEM</b>      | ENSG00000164949 | 10.8            | 8.39            | 1.33E-11      | 6.23E-10    | 5.29            | 3.64E-08      | 1.15E-05    |
| <b>GLUD1</b>    | ENSG00000148672 | 91.8            | 0.69            | 2.18E-04      | 2.26E-03    | 0.68            | 1.88E-04      | 1.19E-02    |
| <b>GPAT3</b>    | ENSG00000138678 | 6.8             | 2.33            | 3.17E-06      | 5.26E-05    | 1.48            | 4.98E-04      | 2.47E-02    |
| <b>GPR137B</b>  | ENSG00000077585 | 15.1            | 2.38            | 7.35E-13      | 4.49E-11    | 0.83            | 1.07E-03      | 4.21E-02    |
| <b>GSTO1</b>    | ENSG00000148834 | 85.1            | 0.80            | 2.46E-04      | 2.50E-03    | 0.74            | 6.33E-04      | 2.97E-02    |
| <b>HAVCR2</b>   | ENSG00000135077 | 25.3            | 1.40            | 1.94E-07      | 4.17E-06    | 0.85            | 6.14E-04      | 2.89E-02    |
| <b>HEI1</b>     | ENSG00000114315 | 12.2            | 5.22            | 7.09E-08      | 1.65E-06    | 3.65            | 3.14E-07      | 5.87E-05    |
| <b>HLA-A</b>    | ENSG00000223980 | 729.5           | 0.70            | 1.28E-03      | 1.02E-02    | 0.75            | 5.52E-04      | 2.66E-02    |
| <b>HLA-A</b>    | ENSG00000224320 | 848.3           | 0.64            | 1.12E-03      | 9.07E-03    | 0.67            | 6.20E-04      | 2.91E-02    |
| <b>HLA-A</b>    | ENSG00000227715 | 787.4           | 0.66            | 1.87E-03      | 1.41E-02    | 0.71            | 8.26E-04      | 3.58E-02    |
| <b>HLA-A</b>    | ENSG00000235657 | 781.5           | 0.63            | 3.15E-03      | 2.18E-02    | 0.69            | 1.15E-03      | 4.48E-02    |
| <b>HLA-DQB1</b> | ENSG00000225824 | 33.0            | 1.33            | 9.31E-04      | 7.78E-03    | 1.32            | 8.50E-04      | 3.65E-02    |
| <b>HLA-DRA</b>  | ENSG00000204287 | 12.0            | 1.31            | 7.35E-03      | 4.37E-02    | 2.75            | 1.18E-07      | 2.78E-05    |
| <b>HLA-DRA</b>  | ENSG00000227993 | 11.6            | 1.41            | 5.81E-03      | 3.61E-02    | 3.35            | 2.57E-09      | 1.39E-06    |
| <b>HLA-DRA</b>  | ENSG00000228987 | 13.6            | 1.56            | 1.52E-03      | 1.18E-02    | 3.34            | 4.79E-10      | 3.27E-07    |
| <b>HLA-DRA</b>  | ENSG00000234794 | 13.2            | 1.88            | 3.23E-05      | 4.18E-04    | 3.94            | 6.25E-14      | 1.10E-10    |
| <b>HLA-DRB1</b> | ENSG00000228080 | 111.4           | 1.54            | 3.13E-03      | 2.17E-02    | 2.75            | 2.70E-07      | 5.27E-05    |
| <b>HLA-DRB1</b> | ENSG00000229074 | 113.7           | 1.84            | 3.53E-04      | 3.42E-03    | 2.88            | 7.09E-08      | 1.92E-05    |
| <b>HLA-DRB4</b> | ENSG00000227357 | 20.9            | 1.55            | 1.97E-03      | 1.48E-02    | 2.20            | 1.43E-05      | 1.55E-03    |
| <b>HLA-DRB4</b> | ENSG00000231021 | 21.3            | 1.88            | 7.43E-05      | 8.79E-04    | 2.57            | 8.73E-08      | 2.25E-05    |
| <b>HNRNPLL</b>  | ENSG00000143889 | 87.6            | 0.79            | 1.13E-04      | 1.26E-03    | 0.71            | 4.60E-04      | 2.35E-02    |
| <b>IFT27</b>    | ENSG00000100360 | 21.3            | 0.70            | 5.11E-03      | 3.25E-02    | 0.90            | 2.45E-04      | 1.45E-02    |
| <b>IGFLR1</b>   | ENSG00000126246 | 59.4            | 0.81            | 1.88E-05      | 2.61E-04    | 1.10            | 4.67E-09      | 2.19E-06    |
| <b>IKZF4</b>    | ENSG00000123411 | 26.2            | 0.81            | 6.43E-03      | 3.93E-02    | 1.53            | 5.39E-07      | 9.42E-05    |
| <b>IL10</b>     | ENSG00000136634 | 28.3            | 3.05            | 8.34E-10      | 2.84E-08    | 2.56            | 1.05E-07      | 2.55E-05    |
| <b>IL1R1</b>    | ENSG00000115594 | 22.0            | 1.47            | 9.82E-06      | 1.45E-04    | 1.19            | 1.91E-04      | 1.20E-02    |
| <b>IL1R2</b>    | ENSG00000115590 | 12.2            | 4.22            | 7.54E-04      | 6.52E-03    | 4.25            | 6.07E-04      | 2.88E-02    |
| <b>IL1RAP</b>   | ENSG00000196083 | 18.1            | 0.87            | 4.66E-03      | 3.01E-02    | 0.97            | 1.31E-03      | 4.91E-02    |
| <b>IL1RN</b>    | ENSG00000136689 | 5.1             | 3.51            | 6.95E-05      | 8.31E-04    | 4.56            | 1.72E-06      | 2.60E-04    |
| <b>IL2RA</b>    | ENSG00000134460 | 114.7           | 0.98            | 4.67E-05      | 5.87E-04    | 3.11            | 2.43E-35      | 5.14E-31    |
| <b>IL2RB</b>    | ENSG00000100385 | 224.5           | 1.96            | 7.34E-12      | 3.62E-10    | 1.22            | 1.76E-05      | 1.84E-03    |
| <b>ITGAM</b>    | ENSG00000169896 | 19.0            | 3.14            | 5.08E-08      | 1.22E-06    | 3.07            | 5.50E-08      | 1.59E-05    |
| <b>JMJD4</b>    | ENSG00000081692 | 43.8            | 1.02            | 1.03E-06      | 1.88E-05    | 0.66            | 8.98E-04      | 3.79E-02    |
| <b>JOSD2</b>    | ENSG00000161677 | 29.9            | 1.14            | 9.96E-06      | 1.47E-04    | 0.85            | 5.78E-04      | 2.76E-02    |
| <b>KAT2B</b>    | ENSG00000114166 | 31.9            | 1.39            | 4.80E-08      | 1.16E-06    | 0.81            | 6.97E-04      | 3.12E-02    |
| <b>KCNK5</b>    | ENSG00000164626 | 5.1             | 4.87            | 3.11E-09      | 9.64E-08    | 2.59            | 4.64E-07      | 8.23E-05    |
| <b>KDM2A</b>    | ENSG00000173120 | 123.4           | 1.05            | 7.55E-07      | 1.42E-05    | 0.69            | 9.00E-04      | 3.79E-02    |
| <b>KLHL2</b>    | ENSG00000109466 | 12.8            | 1.18            | 4.52E-04      | 4.22E-03    | 1.12            | 5.40E-04      | 2.61E-02    |
| <b>LAG3</b>     | ENSG00000089692 | 25.1            | 4.17            | 4.64E-17      | 6.07E-15    | 1.59            | 1.61E-04      | 1.07E-02    |
| <b>LAPTM4B</b>  | ENSG00000104341 | 47.7            | 1.76            | 1.25E-12      | 7.21E-11    | 0.80            | 5.00E-04      | 2.47E-02    |
| <b>LAYN</b>     | ENSG00000204381 | 10.0            | 2.84            | 1.24E-08      | 3.38E-07    | 3.48            | 1.82E-11      | 1.83E-08    |

**Table S4. Upregulated genes in the uTreg-specific core signature.**

| <i>Gene</i>      | uTreg core UP   |                 | UP vs bTreg     |               |             | UP vs uTconv    |               |             |
|------------------|-----------------|-----------------|-----------------|---------------|-------------|-----------------|---------------|-------------|
|                  | <i>Ensembl</i>  | <i>baseMean</i> | <i>Log2(FC)</i> | <i>Pvalue</i> | <i>Padj</i> | <i>Log2(FC)</i> | <i>Pvalue</i> | <i>Padj</i> |
| <b>LGALS1</b>    | ENSG00000100097 | 340.4           | 2.90            | 6.11E-17      | 7.82E-15    | 1.39            | 5.08E-05      | 4.21E-03    |
| <b>LGALS3</b>    | ENSG00000131981 | 197.5           | 2.00            | 7.97E-14      | 5.84E-12    | 1.26            | 1.72E-06      | 2.60E-04    |
| <b>LINC01943</b> | ENSG00000280721 | 29.5            | 2.91            | 2.85E-10      | 1.08E-08    | 2.56            | 1.46E-08      | 5.56E-06    |
| <b>LINC02195</b> | ENSG00000236481 | 6.4             | 2.65            | 4.25E-07      | 8.39E-06    | 4.54            | 3.45E-12      | 4.29E-09    |
| <b>LRRC32</b>    | ENSG00000137507 | 8.4             | 2.49            | 3.39E-04      | 3.31E-03    | 4.27            | 3.07E-08      | 1.01E-05    |
| <b>LTA</b>       | ENSG00000231408 | 9.2             | 2.43            | 9.72E-08      | 2.20E-06    | 1.33            | 3.39E-04      | 1.87E-02    |
| <b>MAF</b>       | ENSG00000178573 | 290.5           | 0.98            | 1.98E-06      | 3.45E-05    | 1.07            | 2.51E-07      | 4.95E-05    |
| <b>MAPKAPK3</b>  | ENSG00000114738 | 62.8            | 1.97            | 5.20E-16      | 5.60E-14    | 0.72            | 1.28E-03      | 4.86E-02    |
| <b>MAST4</b>     | ENSG00000069020 | 181.9           | 1.25            | 2.74E-11      | 1.23E-09    | 0.96            | 1.79E-07      | 3.88E-05    |
| <b>MB21D2</b>    | ENSG00000180611 | 19.9            | 3.33            | 6.67E-11      | 2.78E-09    | 1.68            | 1.70E-04      | 1.11E-02    |
| <b>MCM6</b>      | ENSG00000076003 | 29.5            | 0.77            | 7.50E-04      | 6.49E-03    | 0.95            | 2.43E-05      | 2.32E-03    |
| <b>MGST2</b>     | ENSG00000085871 | 15.3            | 0.87            | 1.58E-03      | 1.22E-02    | 1.65            | 1.19E-08      | 4.67E-06    |
| <b>MIF-AS1</b>   | ENSG00000218537 | 60.7            | 0.79            | 2.99E-04      | 2.97E-03    | 0.73            | 6.10E-04      | 2.88E-02    |
| <b>MTREX</b>     | ENSG00000039123 | 91.6            | 2.46            | 1.62E-14      | 1.38E-12    | 1.68            | 7.36E-08      | 1.94E-05    |
| <b>MT-RNR1</b>   | ENSG00000211459 | 4450.1          | 1.73            | 1.53E-20      | 3.19E-18    | 0.60            | 1.28E-03      | 4.86E-02    |
| <b>MTRNR2L1</b>  | ENSG00000256618 | 2315.5          | 1.43            | 4.17E-16      | 4.53E-14    | 0.60            | 6.77E-04      | 3.09E-02    |
| <b>MTRNR2L10</b> | ENSG00000256045 | 141.2           | 1.65            | 1.64E-13      | 1.14E-11    | 0.69            | 1.24E-03      | 4.76E-02    |
| <b>MYO1E</b>     | ENSG00000157483 | 8.8             | 3.20            | 1.51E-11      | 6.97E-10    | 2.40            | 1.67E-09      | 9.51E-07    |
| <b>MYO7A</b>     | ENSG00000137474 | 10.7            | 1.67            | 1.49E-04      | 1.62E-03    | 1.90            | 1.54E-05      | 1.64E-03    |
| <b>NAB1</b>      | ENSG00000138386 | 13.0            | 2.29            | 1.79E-09      | 5.76E-08    | 1.86            | 6.71E-08      | 1.84E-05    |
| <b>NAMPT</b>     | ENSG00000105835 | 64.2            | 3.21            | 2.78E-59      | 5.23E-56    | 1.81            | 3.15E-29      | 2.22E-25    |
| <b>NAMPTP1</b>   | ENSG00000229644 | 17.8            | 4.02            | 1.48E-23      | 4.55E-21    | 2.75            | 5.12E-18      | 1.80E-14    |
| <b>NCF4</b>      | ENSG00000100365 | 43.6            | 0.78            | 1.81E-03      | 1.38E-02    | 1.15            | 4.20E-06      | 5.29E-04    |
| <b>NDFIP2</b>    | ENSG00000102471 | 26.4            | 3.80            | 5.28E-20      | 1.00E-17    | 1.32            | 9.62E-05      | 7.21E-03    |
| <b>NDUFV2</b>    | ENSG00000178127 | 124.3           | 0.60            | 1.60E-03      | 1.24E-02    | 0.60            | 1.26E-03      | 4.82E-02    |
| <b>NFIL3</b>     | ENSG00000165030 | 18.9            | 5.24            | 6.56E-17      | 8.27E-15    | 2.36            | 1.15E-07      | 2.76E-05    |
| <b>NINJ1</b>     | ENSG00000131669 | 109.4           | 2.23            | 7.31E-17      | 9.16E-15    | 1.18            | 5.11E-06      | 6.31E-04    |
| <b>NMB</b>       | ENSG00000197696 | 13.6            | 2.25            | 2.23E-09      | 7.02E-08    | 1.61            | 2.46E-06      | 3.51E-04    |
| <b>NR4A3</b>     | ENSG00000119508 | 39.3            | 7.22            | 7.00E-18      | 9.99E-16    | 0.80            | 5.07E-04      | 2.50E-02    |
| <b>OGG1</b>      | ENSG00000114026 | 39.8            | 1.04            | 4.55E-07      | 8.94E-06    | 0.66            | 6.41E-04      | 2.98E-02    |
| <b>OTUD1</b>     | ENSG00000165312 | 33.1            | 1.41            | 5.30E-05      | 6.56E-04    | 1.63            | 2.61E-06      | 3.70E-04    |
| <b>PARBPB</b>    | ENSG00000185480 | 13.3            | 1.55            | 2.16E-03      | 1.59E-02    | 1.70            | 6.88E-04      | 3.11E-02    |
| <b>PDCD1</b>     | ENSG00000276977 | 48.4            | 4.09            | 8.79E-26      | 3.41E-23    | 1.16            | 3.57E-04      | 1.92E-02    |
| <b>PDGFA</b>     | ENSG00000197461 | 11.0            | 1.65            | 1.48E-05      | 2.09E-04    | 1.39            | 9.53E-05      | 7.17E-03    |
| <b>PELI1</b>     | ENSG00000197329 | 38.8            | 1.31            | 3.30E-06      | 5.42E-05    | 1.96            | 7.41E-12      | 8.24E-09    |
| <b>PGAM1P8</b>   | ENSG00000255200 | 37.6            | 1.24            | 1.04E-07      | 2.34E-06    | 0.70            | 1.33E-03      | 4.94E-02    |
| <b>PGK1</b>      | ENSG00000102144 | 412.2           | 1.33            | 3.42E-10      | 1.26E-08    | 0.81            | 1.09E-04      | 7.95E-03    |
| <b>PGM2L1</b>    | ENSG00000165434 | 96.0            | 1.13            | 1.90E-08      | 5.04E-07    | 0.82            | 2.90E-05      | 2.69E-03    |
| <b>PHLDA1</b>    | ENSG00000139289 | 302.4           | 4.72            | 2.67E-72      | 1.82E-68    | 0.77            | 1.22E-03      | 4.68E-02    |
| <b>PHLDA2</b>    | ENSG00000181649 | 10.3            | 4.91            | 2.64E-12      | 1.41E-10    | 1.68            | 6.70E-05      | 5.34E-03    |
| <b>PHLDA2</b>    | ENSG00000274538 | 10.6            | 4.59            | 1.19E-13      | 8.49E-12    | 1.90            | 2.36E-06      | 3.39E-04    |
| <b>PHTF2</b>     | ENSG00000006576 | 43.3            | 1.65            | 1.03E-15      | 1.05E-13    | 0.67            | 2.62E-04      | 1.52E-02    |
| <b>PIGT</b>      | ENSG00000124155 | 43.2            | 0.70            | 1.85E-03      | 1.40E-02    | 0.83            | 1.71E-04      | 1.11E-02    |
| <b>PIM3</b>      | ENSG00000198355 | 173.1           | 2.55            | 3.74E-17      | 4.95E-15    | 1.04            | 4.16E-04      | 2.19E-02    |
| <b>PKM</b>       | ENSG00000067225 | 645.7           | 1.18            | 6.06E-06      | 9.47E-05    | 1.22            | 3.07E-06      | 4.27E-04    |
| <b>PLPP1</b>     | ENSG00000067113 | 55.9            | 3.51            | 7.01E-12      | 3.50E-10    | 2.17            | 1.10E-05      | 1.24E-03    |
| <b>PMAIP1</b>    | ENSG00000141682 | 41.3            | 2.33            | 4.27E-14      | 3.29E-12    | 1.17            | 4.97E-05      | 4.14E-03    |
| <b>PMVK</b>      | ENSG00000163344 | 40.2            | 1.04            | 2.94E-06      | 4.94E-05    | 0.69            | 1.26E-03      | 4.80E-02    |
| <b>PRDM1</b>     | ENSG00000057657 | 221.3           | 0.75            | 7.56E-05      | 8.92E-04    | 1.12            | 3.43E-09      | 1.72E-06    |
| <b>PRDX1</b>     | ENSG00000117450 | 77.6            | 0.57            | 3.67E-03      | 2.47E-02    | 0.72            | 2.27E-04      | 1.35E-02    |
| <b>PRNP</b>      | ENSG00000171867 | 62.5            | 1.90            | 2.57E-10      | 9.77E-09    | 0.92            | 1.35E-03      | 4.99E-02    |
| <b>PSMD1</b>     | ENSG00000173692 | 78.1            | 0.56            | 6.80E-04      | 5.95E-03    | 0.53            | 9.62E-04      | 3.97E-02    |
| <b>PSMD8</b>     | ENSG00000099341 | 126.4           | 0.51            | 3.59E-04      | 3.47E-03    | 0.59            | 3.06E-05      | 2.83E-03    |
| <b>PTP4A3</b>    | ENSG00000184489 | 9.6             | 1.72            | 6.52E-04      | 5.75E-03    | 1.80            | 2.79E-04      | 1.59E-02    |
| <b>PTP4A3</b>    | ENSG00000275575 | 7.4             | 1.66            | 3.52E-03      | 2.40E-02    | 1.98            | 5.20E-04      | 2.55E-02    |
| <b>PTTG1</b>     | ENSG00000164611 | 34.7            | 1.40            | 1.14E-05      | 1.64E-04    | 1.55            | 1.08E-06      | 1.71E-04    |
| <b>PXK</b>       | ENSG00000168297 | 14.5            | 1.14            | 1.04E-04      | 1.18E-03    | 0.95            | 6.53E-04      | 3.02E-02    |
| <b>RAB10</b>     | ENSG00000084733 | 52.4            | 0.92            | 4.96E-07      | 9.67E-06    | 0.60            | 5.66E-04      | 2.70E-02    |
| <b>RAC1</b>      | ENSG00000136238 | 238.4           | 0.62            | 3.09E-04      | 3.06E-03    | 0.66            | 9.74E-05      | 7.27E-03    |

**Table S4. Upregulated genes in the uTreg-specific core signature.**

| <i>Gene</i>         | uTreg core UP   |                 | UP vs bTreg     |               |             | UP vs uTconv    |               |             |
|---------------------|-----------------|-----------------|-----------------|---------------|-------------|-----------------|---------------|-------------|
|                     | <i>Ensembl</i>  | <i>baseMean</i> | <i>Log2(FC)</i> | <i>Pvalue</i> | <i>Padj</i> | <i>Log2(FC)</i> | <i>Pvalue</i> | <i>Padj</i> |
| <b>RBKS</b>         | ENSG00000171174 | 7.1             | 2.49            | 5.12E-06      | 8.13E-05    | 1.79            | 2.02E-04      | 1.24E-02    |
| <b>RCAN2</b>        | ENSG00000172348 | 10.1            | 7.23            | 3.94E-12      | 2.04E-10    | 2.78            | 3.20E-05      | 2.93E-03    |
| <b>RDH10</b>        | ENSG00000121039 | 21.8            | 2.01            | 4.25E-08      | 1.04E-06    | 2.20            | 1.49E-09      | 8.77E-07    |
| <b>RHBDD2</b>       | ENSG00000005486 | 119.4           | 1.02            | 3.31E-05      | 4.29E-04    | 0.78            | 1.35E-03      | 4.99E-02    |
| <b>RHPN2</b>        | ENSG00000131941 | 87.0            | 1.20            | 9.09E-11      | 3.73E-09    | 1.07            | 4.40E-09      | 2.15E-06    |
| <b>RNF187</b>       | ENSG00000168159 | 79.1            | 0.81            | 2.16E-04      | 2.24E-03    | 0.75            | 5.21E-04      | 2.55E-02    |
| <b>SAT1</b>         | ENSG00000130066 | 194.6           | 0.79            | 1.03E-03      | 8.44E-03    | 0.94            | 1.07E-04      | 7.82E-03    |
| <b>SDC4</b>         | ENSG00000124145 | 39.0            | 3.53            | 1.11E-22      | 3.14E-20    | 1.83            | 1.47E-08      | 5.56E-06    |
| <b>SDF4</b>         | ENSG00000078808 | 115.6           | 0.85            | 9.96E-05      | 1.14E-03    | 0.77            | 3.34E-04      | 1.85E-02    |
| <b>SEC14L1</b>      | ENSG00000129657 | 64.4            | 0.88            | 1.17E-04      | 1.30E-03    | 0.76            | 7.62E-04      | 3.35E-02    |
| <b>SETBP1</b>       | ENSG00000152217 | 4.7             | 3.11            | 6.49E-06      | 1.01E-04    | 1.83            | 7.08E-04      | 3.16E-02    |
| <b>SGMS1</b>        | ENSG00000198964 | 21.7            | 0.86            | 1.02E-03      | 8.41E-03    | 1.19            | 5.65E-06      | 6.90E-04    |
| <b>SIGLEC17P</b>    | ENSG00000171101 | 15.4            | 5.68            | 5.02E-15      | 4.70E-13    | 3.41            | 3.33E-10      | 2.35E-07    |
| <b>SIPA1L1</b>      | ENSG00000197555 | 36.4            | 1.50            | 4.21E-09      | 1.25E-07    | 1.07            | 8.86E-06      | 1.03E-03    |
| <b>SLC16A1</b>      | ENSG00000155380 | 9.0             | 1.59            | 3.33E-05      | 4.31E-04    | 1.49            | 4.48E-05      | 3.86E-03    |
| <b>SLC27A2</b>      | ENSG00000140284 | 4.6             | 4.87            | 5.27E-07      | 1.02E-05    | 3.45            | 8.25E-06      | 9.79E-04    |
| <b>SLC5A3</b>       | ENSG00000198743 | 33.6            | 1.96            | 2.69E-16      | 3.06E-14    | 0.69            | 6.94E-04      | 3.12E-02    |
| <b>SLC7A5</b>       | ENSG00000103257 | 72.9            | 3.63            | 2.77E-23      | 8.34E-21    | 1.45            | 1.83E-05      | 1.88E-03    |
| <b>SLCO4A1</b>      | ENSG00000101187 | 4.8             | 3.53            | 5.97E-07      | 1.15E-05    | 2.08            | 2.27E-04      | 1.35E-02    |
| <b>SMOX</b>         | ENSG00000088826 | 6.0             | 4.83            | 5.65E-08      | 1.34E-06    | 2.20            | 1.63E-04      | 1.07E-02    |
| <b>SNAP47</b>       | ENSG00000143740 | 41.5            | 2.09            | 3.46E-12      | 1.81E-10    | 1.16            | 4.04E-05      | 3.52E-03    |
| <b>SNX5</b>         | ENSG00000089006 | 76.3            | 0.52            | 2.92E-04      | 2.91E-03    | 0.56            | 5.66E-05      | 4.59E-03    |
| <b>SNX9</b>         | ENSG00000130340 | 38.7            | 1.64            | 7.13E-07      | 1.35E-05    | 1.38            | 2.01E-05      | 2.04E-03    |
| <b>SOX4</b>         | ENSG00000124766 | 12.6            | 1.89            | 2.02E-04      | 2.12E-03    | 2.21            | 1.46E-05      | 1.58E-03    |
| <b>SPATS2L</b>      | ENSG00000196141 | 90.6            | 1.55            | 1.12E-19      | 2.01E-17    | 0.81            | 4.40E-07      | 7.87E-05    |
| <b>SRGN</b>         | ENSG00000122862 | 1731.7          | 2.71            | 1.15E-46      | 1.36E-43    | 0.69            | 2.21E-04      | 1.33E-02    |
| <b>SURF4</b>        | ENSG00000148248 | 73.2            | 1.49            | 3.46E-10      | 1.27E-08    | 0.74            | 1.20E-03      | 4.64E-02    |
| <b>SUSD6</b>        | ENSG00000100647 | 70.5            | 1.14            | 3.47E-06      | 5.68E-05    | 0.80            | 9.72E-04      | 3.99E-02    |
| <b>SYT11</b>        | ENSG00000132718 | 44.7            | 0.69            | 4.55E-04      | 4.24E-03    | 1.08            | 4.90E-08      | 1.48E-05    |
| <b>TFRC</b>         | ENSG00000072274 | 78.9            | 1.02            | 3.36E-08      | 8.38E-07    | 1.28            | 3.30E-12      | 4.29E-09    |
| <b>TGIF2-RAB51F</b> | ENSG00000259399 | 8.7             | 0.98            | 7.50E-03      | 4.44E-02    | 1.24            | 6.52E-04      | 3.02E-02    |
| <b>TMED3</b>        | ENSG00000166557 | 67.3            | 0.59            | 2.95E-04      | 2.94E-03    | 0.77            | 1.49E-06      | 2.30E-04    |
| <b>TMEM173</b>      | ENSG00000184584 | 225.7           | 0.87            | 6.27E-06      | 9.77E-05    | 0.65            | 6.75E-04      | 3.09E-02    |
| <b>TNFRSF13B</b>    | ENSG00000240505 | 4.5             | 3.63            | 6.63E-06      | 1.02E-04    | 6.76            | 1.88E-09      | 1.05E-06    |
| <b>TNFRSF18</b>     | ENSG00000186891 | 58.6            | 4.15            | 3.77E-22      | 1.03E-19    | 2.19            | 3.20E-08      | 1.04E-05    |
| <b>TNFRSF1B</b>     | ENSG00000028137 | 539.9           | 1.11            | 9.86E-06      | 1.46E-04    | 1.20            | 1.91E-06      | 2.85E-04    |
| <b>TNFRSF4</b>      | ENSG00000186827 | 95.2            | 3.07            | 7.53E-17      | 9.38E-15    | 2.82            | 1.04E-14      | 2.45E-11    |
| <b>TNFRSF8</b>      | ENSG00000120949 | 2.8             | 2.44            | 3.66E-03      | 2.47E-02    | 4.56            | 2.11E-05      | 2.12E-03    |
| <b>TNFRSF9</b>      | ENSG00000049249 | 74.3            | 1.55            | 9.01E-11      | 3.70E-09    | 1.13            | 1.06E-06      | 1.69E-04    |
| <b>TNIP2</b>        | ENSG00000168884 | 77.4            | 0.95            | 4.76E-04      | 4.41E-03    | 0.92            | 6.80E-04      | 3.09E-02    |
| <b>TNS3</b>         | ENSG00000136205 | 19.4            | 2.25            | 2.74E-12      | 1.45E-10    | 0.92            | 4.31E-04      | 2.26E-02    |
| <b>TOX2</b>         | ENSG00000124191 | 14.5            | 2.31            | 1.08E-04      | 1.22E-03    | 2.66            | 8.41E-06      | 9.93E-04    |
| <b>TP53INP2</b>     | ENSG00000078804 | 15.0            | 4.26            | 1.64E-14      | 1.39E-12    | 1.03            | 9.85E-04      | 4.01E-02    |
| <b>TPI1</b>         | ENSG00000111669 | 218.1           | 1.50            | 2.84E-08      | 7.24E-07    | 0.99            | 2.46E-04      | 1.45E-02    |
| <b>TPP1</b>         | ENSG00000166340 | 187.5           | 0.66            | 1.12E-03      | 9.09E-03    | 0.68            | 6.95E-04      | 3.12E-02    |
| <b>TRAF1</b>        | ENSG00000056558 | 64.5            | 1.45            | 4.55E-08      | 1.11E-06    | 1.13            | 1.29E-05      | 1.42E-03    |
| <b>TRAF3</b>        | ENSG00000131323 | 27.8            | 0.58            | 7.40E-03      | 4.39E-02    | 0.84            | 1.07E-04      | 7.82E-03    |
| <b>TRPS1</b>        | ENSG00000104447 | 17.6            | 1.09            | 3.84E-04      | 3.66E-03    | 0.94            | 1.34E-03      | 4.98E-02    |
| <b>TSPAN13</b>      | ENSG00000106537 | 5.8             | 6.96            | 5.27E-06      | 8.34E-05    | 5.08            | 1.82E-04      | 1.16E-02    |
| <b>TSPAN17</b>      | ENSG00000048140 | 25.6            | 0.84            | 2.46E-03      | 1.77E-02    | 0.95            | 5.64E-04      | 2.70E-02    |
| <b>TTYH3</b>        | ENSG00000136295 | 5.3             | 2.36            | 6.21E-05      | 7.51E-04    | 1.80            | 9.18E-04      | 3.84E-02    |
| <b>U62317.1</b>     | ENSG00000272666 | 5.2             | 3.30            | 5.54E-07      | 1.07E-05    | 1.82            | 9.99E-04      | 4.04E-02    |
| <b>UBASH3B</b>      | ENSG00000154127 | 30.9            | 1.24            | 1.72E-06      | 3.03E-05    | 1.17            | 3.10E-06      | 4.28E-04    |
| <b>VDR</b>          | ENSG00000111424 | 67.0            | 1.87            | 2.58E-13      | 1.73E-11    | 1.92            | 3.81E-14      | 8.05E-11    |
| <b>VMP1</b>         | ENSG00000062716 | 123.1           | 0.53            | 9.93E-05      | 1.13E-03    | 0.56            | 3.13E-05      | 2.88E-03    |
| <b>ZBED2</b>        | ENSG00000177494 | 5.9             | 5.64            | 8.61E-11      | 3.54E-09    | 3.31            | 2.96E-10      | 2.16E-07    |
| <b>ZBTB32</b>       | ENSG00000011590 | 5.6             | 2.22            | 7.03E-04      | 6.13E-03    | 3.74            | 3.04E-07      | 5.74E-05    |
| <b>ZNF282</b>       | ENSG00000170265 | 34.4            | 2.44            | 4.55E-10      | 1.63E-08    | 2.04            | 8.74E-08      | 2.25E-05    |
| <b>ZNRF1</b>        | ENSG00000186187 | 29.0            | 2.72            | 6.38E-15      | 5.90E-13    | 1.37            | 1.31E-05      | 1.43E-03    |

**Table S5. Downregulated genes in the uTreg-specific core signature.**

| <i>Gene</i>       | <b>uTreg core DOWN</b> |                 | <b>DOWN vs bTreg</b> |               |             | <b>DOWN vs uTconv</b> |               |             |
|-------------------|------------------------|-----------------|----------------------|---------------|-------------|-----------------------|---------------|-------------|
|                   | <i>Ensembl</i>         | <i>baseMean</i> | <i>Log2(FC)</i>      | <i>Pvalue</i> | <i>Padj</i> | <i>Log2(FC)</i>       | <i>Pvalue</i> | <i>Padj</i> |
| <b>ABLIM1</b>     | ENSG00000099204        | 131.6           | -2.07                | 5.82E-32      | 3.36E-29    | -0.84                 | 3.61E-06      | 4.70E-04    |
| <b>AL157935.1</b> | ENSG00000227218        | 19.5            | -1.55                | 4.81E-08      | 1.16E-06    | -1.00                 | 5.53E-04      | 2.66E-02    |
| <b>APBA2</b>      | ENSG00000034053        | 17.8            | -1.10                | 1.54E-03      | 1.20E-02    | -1.44                 | 1.55E-05      | 1.64E-03    |
| <b>ATF7IP2</b>    | ENSG00000166669        | 56.4            | -1.44                | 1.84E-12      | 1.02E-10    | -0.95                 | 3.88E-06      | 4.97E-04    |
| <b>BEX2</b>       | ENSG00000133134        | 42.6            | -2.54                | 4.66E-20      | 8.90E-18    | -1.20                 | 3.25E-05      | 2.96E-03    |
| <b>CCR7</b>       | ENSG00000126353        | 605.6           | -1.83                | 2.50E-13      | 1.68E-11    | -0.94                 | 1.80E-04      | 1.15E-02    |
| <b>GCSAM</b>      | ENSG00000174500        | 29.7            | -1.25                | 4.56E-04      | 4.25E-03    | -1.96                 | 8.19E-09      | 3.39E-06    |
| <b>GIMAP4</b>     | ENSG00000133574        | 251.1           | -1.63                | 3.65E-23      | 1.07E-20    | -0.81                 | 1.02E-06      | 1.65E-04    |
| <b>GIMAP7</b>     | ENSG00000179144        | 352.4           | -2.13                | 1.31E-21      | 3.20E-19    | -0.74                 | 1.01E-03      | 4.06E-02    |
| <b>IL7R</b>       | ENSG00000168685        | 1201.0          | -0.71                | 8.53E-03      | 4.92E-02    | -1.62                 | 1.27E-09      | 7.65E-07    |
| <b>ITGA6</b>      | ENSG00000091409        | 53.7            | -2.28                | 4.53E-20      | 8.72E-18    | -0.90                 | 5.64E-04      | 2.70E-02    |
| <b>LDLRAP1</b>    | ENSG00000157978        | 166.2           | -2.14                | 8.14E-30      | 4.19E-27    | -0.62                 | 1.32E-03      | 4.91E-02    |
| <b>LEF1</b>       | ENSG00000138795        | 241.9           | -3.31                | 2.49E-57      | 4.22E-54    | -0.77                 | 3.16E-04      | 1.78E-02    |
| <b>LINC02273</b>  | ENSG00000245954        | 42.9            | -1.82                | 2.72E-08      | 6.96E-07    | -1.81                 | 2.20E-08      | 7.49E-06    |
| <b>MGAT4A</b>     | ENSG00000071073        | 100.1           | -1.09                | 5.05E-09      | 1.48E-07    | -1.07                 | 5.30E-09      | 2.38E-06    |
| <b>PLAC8</b>      | ENSG00000145287        | 136.7           | -1.02                | 1.12E-06      | 2.04E-05    | -1.09                 | 1.17E-07      | 2.78E-05    |
| <b>PRKCB</b>      | ENSG00000166501        | 114.2           | -1.23                | 1.27E-12      | 7.30E-11    | -0.85                 | 1.19E-06      | 1.86E-04    |
| <b>RARRES3</b>    | ENSG00000133321        | 208.5           | -0.62                | 4.25E-04      | 4.00E-03    | -0.70                 | 5.82E-05      | 4.67E-03    |
| <b>RBL2</b>       | ENSG00000103479        | 105.8           | -0.96                | 7.38E-08      | 1.71E-06    | -0.64                 | 3.14E-04      | 1.78E-02    |
| <b>SATB1</b>      | ENSG00000182568        | 163.1           | -0.80                | 1.10E-03      | 8.91E-03    | -1.26                 | 2.07E-07      | 4.34E-05    |
| <b>TCF7</b>       | ENSG00000081059        | 493.4           | -1.75                | 1.84E-25      | 6.80E-23    | -1.11                 | 4.86E-11      | 4.28E-08    |
| <b>TTC39C</b>     | ENSG00000168234        | 158.1           | -1.36                | 6.25E-25      | 2.18E-22    | -0.71                 | 1.30E-07      | 2.98E-05    |
| <b>TTC9</b>       | ENSG00000133985        | 40.7            | -0.99                | 8.71E-04      | 7.37E-03    | -1.15                 | 9.23E-05      | 7.02E-03    |

**Table S6. Overlap of tumor-infiltrating Treg signatures with significantly upregulated genes in uTregs vs bTregs (% of overlapping genes/genes in signature).**

| Overlap between uTregs and tumor-infiltrating Treg signatures |               |                  |                |              |                 |               |
|---------------------------------------------------------------|---------------|------------------|----------------|--------------|-----------------|---------------|
| Tirosh et al                                                  | Zheng et al   | De Simone et al. | Pacella et al. | Toker et al. | Magnuson et al. | Plitas et al. |
| 75/172 (44%)                                                  | 225/401 (56%) | 92/309 (30%)     | 91/211 (43%)   | 42/124 (34%) | 70/108 (65%)    | 105/423 (25%) |
| ACP5                                                          | ACP5          | ACAA2            | ACP5           | ARHGEF12     | ANXA4           | ACSL4         |
| AGTRAP                                                        | ACSL4         | ACP5             | ACTG2          | BCL2L1       | ARHGEF12        | ACTG2         |
| ANXA2                                                         | ACTN4         | ACSL4            | AKAP13         | CD80         | ATF3            | ADPRH         |
| B4GALT1                                                       | AKIRIN2       | ACTG2            | AKIRIN2        | COL5A1       | BATF            | AKAP5         |
| BATF                                                          | APOBEC3C      | ADPRH            | APOBEC3C       | CRADD        | BCL2L1          | ASB2          |
| BIRC3                                                         | APOBEC3G      | AKAP5            | ARID5B         | CREB3L2      | CAPG            | ATP6V1A       |
| BST2                                                          | ARHGEF12      | ARHGEF12         | ATP6V1B2       | CTSC         | CCR5            | ATP6V1C2      |
| C17orf49                                                      | ARID5B        | ARNTL2           | ATP6V1D        | DPYSL2       | CD74            | AURKA         |
| C3AR1                                                         | ARPP19        | AURKA            | B3GAT1         | GADD45A      | CD80            | BCL2          |
| CAP1                                                          | ASB2          | BATF             | BCL2L1         | GCNT1        | CDKN1A          | C3AR1         |
| CCND2                                                         | ASXL2         | BCL2L1           | CAMK1          | HIP1         | CPD             | CCND2         |
| CD79B                                                         | ATP1B1        | CD7              | CCDC6          | ICOS         | CREB3L2         | CCRL2         |
| CLIC1                                                         | ATP6V1C2      | CDK6             | CCND2          | IL1R1        | CREM            | CD40LG        |
| CMC2                                                          | BATF          | CEACAM1          | CD2            | IL1R2        | CTNNA1          | CD7           |
| COX17                                                         | BCL2L1        | CGA              | CD4            | IL2RA        | CTSH            | CD79B         |
| CRADD                                                         | BIRC3         | COL9A2           | CD63           | KAT2B        | CXCR3           | CD80          |
| CTLA4                                                         | BST2          | CRADD            | CD7            | KBTBD8       | CYFIP1          | CDK6          |
| CTSC                                                          | BTG3          | CREB3L2          | CD74           | KSR1         | DUSP4           | CGA           |
| CXCR3                                                         | C21orf91      | CSF1             | CD79B          | LAPTM4B      | ENTPD1          | CKS2          |
| CXCR6                                                         | C3AR1         | CTLA4            | CDK2AP1        | LAYN         | FAM126A         | COL9A2        |
| DPYSL2                                                        | CCL20         | CTSC             | CEACAM1        | LRRC32       | FAM129A         | CORO1C        |
| EIF4A1                                                        | CCND2         | DPYSL2           | CLIC1          | LTA          | FNDC3B          | COX17         |
| ENO1                                                          | CCR1          | EML2             | COL5A1         | MAST4        | FURIN           | CPXM1         |
| EPS15                                                         | CCR5          | ENTPD1           | COL9A2         | MYO5A        | GCNT1           | CRADD         |
| ERI1                                                          | CD2           | ERI1             | COMMD7         | NAMPT        | GRN             | CREB3L2       |
| ICOS                                                          | CD63          | ETV7             | CRADD          | NCOA3        | HIF1A           | CSF1          |
| IFI6                                                          | CD7           | EVA1B            | CREB3L2        | NETO2        | HIVEP3          | CTSC          |
| IL1R2                                                         | CD74          | FBXO45           | CST7           | PDGFA        | ICOS            | DPYSL2        |
| IL2RA                                                         | CD79B         | FKBP1A           | CTNNA1         | PHACTR2      | IKZF4           | DYNC1I2       |
| IL2RB                                                         | CD80          | FNDC3B           | CTSC           | PHTF2        | IL1R2           | EGR3          |
| IL2RG                                                         | CD82          | FUCA2            | CXCR6          | PTP4A3       | IL1RL1          | ENTPD1        |
| ISG15                                                         | CD83          | GADD45A          | DPYSL2         | SAT1         | IRAK2           | ETV7          |
| LGALS1                                                        | CDIP1         | GCNT1            | ENO1           | SEC14L1      | IRF5            | FAM126A       |
| LGALS3                                                        | CDKN1A        | HAP1             | ENTPD1         | SGMS1        | ISG15           | FNDC3B        |
| LY6E                                                          | CDKN2A        | HAVCR2           | ERI1           | SLAMF1       | LAMP2           | FUCA2         |
| MAPKAPK3                                                      | CEACAM1       | HIVEP3           | FBLN7          | SLC16A1      | LAPTM4B         | GALM          |
| MRPS6                                                         | CLIC1         | ICOS             | GALM           | SOX4         | MAP2K3          | GCNT1         |
| MX1                                                           | CMTM6         | IGFLR1           | GAPDH          | TNFRSF13B    | MAPKAPK2        | GEM           |
| MYL6                                                          | COL9A2        | IKZF4            | GLA            | TNFRSF1B     | MAPKAPK3        | HAVCR2        |
| NAMPT                                                         | CREB3L2       | IL1R2            | GRAMD4         | TPP1         | MRPS6           | HIVEP3        |
| NCF4                                                          | CREM          | IL1RL1           | HLA-DRB4       | WLS          | MVP             | HMOX1         |
| NDUFV2                                                        | CSF1          | IL2RA            | HSP90AA1       | ZBTB32       | MXD1            | HSPA1A        |
| NFKBIZ                                                        | CST7          | IL2RB            | IFI27          |              | NAMPT           | ICOS          |
| OAS1                                                          | CTLA4         | KAT2B            | IFI35          |              | NCF4            | IFT27         |
| PELI1                                                         | CTNNA1        | KLHDC7B          | IL18R1         |              | NDRG1           | IKZF4         |
| PGK1                                                          | CTSC          | LAPTM4B          | IL1R1          |              | NINJ1           | IL1A          |
| PHTF2                                                         | CTSD          | LAX1             | IL1R2          |              | OSBPL3          | IL1R1         |
| PLP2                                                          | CXCR3         | LAYN             | IRF4           |              | PICALM          | IL1R2         |
| PRDM1                                                         | CXCR6         | LEPROT           | ITGB2          |              | PLP2            | IL1RL1        |
| PRDX3                                                         | DDIT4         | LTA              | KAT2B          |              | PMAIP1          | IL1RN         |
| PRNP                                                          | DDX24         | MAP1LC3A         | LAPTM4B        |              | RHBDD2          | IL2RA         |
| PTTG1                                                         | DPYSL2        | MAST4            | LAX1           |              | RHOC            | IL4R          |
| RPS27L                                                        | DUSP2         | MGST2            | LAYN           |              | SAMSN1          | IRAK2         |
| S100A4                                                        | DUSP4         | MICAL2           | LGALS1         |              | SDC4            | IRF5          |
| S100A6                                                        | DYNLL1        | MINPP1           | LTA            |              | SEC14L1         | KSR1          |

**Table S6. Overlap of tumor-infiltrating Treg signatures with significantly upregulated genes in uTregs vs bTregs (% of overlapping genes/genes in signature).**

| Overlap between uTregs and tumor-infiltrating Treg signatures |             |                  |                |              |                 |               |
|---------------------------------------------------------------|-------------|------------------|----------------|--------------|-----------------|---------------|
| Tirosh et al                                                  | Zheng et al | De Simone et al. | Pacella et al. | Toker et al. | Magnuson et al. | Plitas et al. |
| SAMSN1                                                        | EDARADD     | MREG             | MAPK6          |              | SKAP2           | LAPTM4B       |
| SAT1                                                          | ENO1        | NAB1             | MFHAS1         |              | SNX9            | LAYN          |
| SDC4                                                          | ENTPD1      | NCF4             | MGST2          |              | SSH1            | MAP2K3        |
| SDF4                                                          | ERI1        | NDFIP2           | MYO5A          |              | TMBIM1          | MGST2         |
| SLAMF1                                                        | ETV7        | NETO2            | MZB1           |              | TNFRSF18        | MICAL2        |
| SNX5                                                          | FAM129A     | NUSAP1           | NAB1           |              | TNFRSF1B        | MIR155HG      |
| SPPL2A                                                        | FBLN7       | PAM              | NFIL3          |              | TNFRSF4         | MRPS6         |
| SQSTM1                                                        | FKBP1A      | PARD6G           | PAM            |              | TNFRSF8         | MYO1E         |
| TANK                                                          | FOS         | PDGFA            | PMAIP1         |              | TNFRSF9         | NAGA          |
| TFRC                                                          | FOSL2       | PRDX3            | PMVK           |              | TNIP2           | NCF4          |
| TMED9                                                         | FYCO1       | PTP4A3           | PRDX5          |              | TRAF1           | NEDD9         |
| TMEM173                                                       | GABARAPL1   | PTTG1            | PRNP           |              | TRAF3           | NFKB2         |
| TNFRSF18                                                      | GADD45A     | RBKS             | PSTPIP1        |              | UEVLD           | NR4A1         |
| TNFRSF1B                                                      | GADD45G     | RDH10            | RGS1           |              | VIM             | NTRK1         |
| TNFRSF4                                                       | GALM        | RYBP             | RHOB           |              | ZNRF1           | PARD6G        |
| TPM4                                                          | GAPDH       | SECTM1           | SAMD9          |              |                 | PARBP         |
| TPP1                                                          | GCNT1       | SLC16A1          | SCD            |              |                 | PDGFA         |
| TXN                                                           | GOLGA8A     | SNAP47           | SDC4           |              |                 | PDIA6         |
| TYMP                                                          | GPI         | SOX4             | SETBP1         |              |                 | PHLDA1        |
| VDR                                                           | GRN         | SPATS2L          | SFT2D1         |              |                 | PIK3AP1       |
|                                                               | GSTO1       | SSH1             | SH2D1A         |              |                 | PSEN1         |
|                                                               | HAVCR2      | SYT11            | SH2D2A         |              |                 | PTP4A3        |
|                                                               | HERPUD1     | TFRC             | SLC20A1        |              |                 | PTTG1         |
|                                                               | HLA-DQB1    | THADA            | SOCS1          |              |                 | RBBP8         |
|                                                               | HLA-DRB1    | TMEM184C         | SPPL2A         |              |                 | RBKS          |
|                                                               | HLA-J       | TNFRSF18         | TFRC           |              |                 | RHOC          |
|                                                               | HNRNPLL     | TNFRSF4          | TMCO1          |              |                 | SDC4          |
|                                                               | HSPA1A      | TNFRSF8          | TMEM109        |              |                 | SETBP1        |
|                                                               | HSPB1       | TNFRSF9          | TNFRSF1B       |              |                 | SH2D2A        |
|                                                               | ICOS        | TOX2             | TNS3           |              |                 | SLAMF1        |
|                                                               | IFI6        | TPP1             | TPI1           |              |                 | SLC4A2        |
|                                                               | IGFLR1      | TRAF3            | TTYH3          |              |                 | SLCO4A1       |
|                                                               | IKZF4       | TSPAN17          | ZBED2          |              |                 | SNX5          |
|                                                               | IL10RB      | VDR              | ZBTB32         |              |                 | SPATS2L       |
|                                                               | IL18R1      | YIPF6            | ZFAND5         |              |                 | THADA         |
|                                                               | IL1R1       | ZBED2            | ZFP36L1        |              |                 | TNFRSF18      |
|                                                               | IL1R2       | ZNF282           |                |              |                 | TNFRSF1B      |
|                                                               | IL2RA       |                  |                |              |                 | TNFRSF4       |
|                                                               | IL2RB       |                  |                |              |                 | TNFRSF8       |
|                                                               | IL4R        |                  |                |              |                 | TNFRSF9       |
|                                                               | IQGAP1      |                  |                |              |                 | TNIP2         |
|                                                               | IRF5        |                  |                |              |                 | TNIP3         |
|                                                               | ISG15       |                  |                |              |                 | TNS3          |
|                                                               | IVNS1ABP    |                  |                |              |                 | TRAF1         |
|                                                               | KAT2B       |                  |                |              |                 | TYMP          |
|                                                               | KDM5B       |                  |                |              |                 | UBASH3B       |
|                                                               | KIF20B      |                  |                |              |                 | VDR           |
|                                                               | LAPTM4A     |                  |                |              |                 | VRK2          |
|                                                               | LAPTM4B     |                  |                |              |                 | XXYLT1        |
|                                                               | LAT2        |                  |                |              |                 | ZBED2         |
|                                                               | LAYN        |                  |                |              |                 |               |
|                                                               | LDHA        |                  |                |              |                 |               |
|                                                               | LEPROT      |                  |                |              |                 |               |
|                                                               | LGALS1      |                  |                |              |                 |               |
|                                                               | LGALS3      |                  |                |              |                 |               |
|                                                               | LINC00963   |                  |                |              |                 |               |
|                                                               | LRPAP1      |                  |                |              |                 |               |

**Table S6. Overlap of tumor-infiltrating Treg signatures with significantly upregulated genes in uTregs vs bTregs (% of overlapping genes/genes in signature).**

| Overlap between uTregs and tumor-infiltrating Treg signatures |             |                  |                |              |                 |               |
|---------------------------------------------------------------|-------------|------------------|----------------|--------------|-----------------|---------------|
| Tirosh et al                                                  | Zheng et al | De Simone et al. | Pacella et al. | Toker et al. | Magnuson et al. | Plitas et al. |
|                                                               | LTA         |                  |                |              |                 |               |
|                                                               | LYST        |                  |                |              |                 |               |
|                                                               | MAF         |                  |                |              |                 |               |
|                                                               | MAP2K3      |                  |                |              |                 |               |
|                                                               | MAPKAPK3    |                  |                |              |                 |               |
|                                                               | MAST4       |                  |                |              |                 |               |
|                                                               | MCL1        |                  |                |              |                 |               |
|                                                               | MICAL2      |                  |                |              |                 |               |
|                                                               | MIR497HG    |                  |                |              |                 |               |
|                                                               | MKNK1       |                  |                |              |                 |               |
|                                                               | MRPS6       |                  |                |              |                 |               |
|                                                               | MYO5A       |                  |                |              |                 |               |
|                                                               | MZB1        |                  |                |              |                 |               |
|                                                               | NAMPT       |                  |                |              |                 |               |
|                                                               | NCF4        |                  |                |              |                 |               |
|                                                               | NCOA3       |                  |                |              |                 |               |
|                                                               | NDFIP2      |                  |                |              |                 |               |
|                                                               | NEDD9       |                  |                |              |                 |               |
|                                                               | NRBP1       |                  |                |              |                 |               |
|                                                               | OAS1        |                  |                |              |                 |               |
|                                                               | P2RY10      |                  |                |              |                 |               |
|                                                               | PAM         |                  |                |              |                 |               |
|                                                               | PDCD1       |                  |                |              |                 |               |
|                                                               | PDIA6       |                  |                |              |                 |               |
|                                                               | PELI1       |                  |                |              |                 |               |
|                                                               | PFKFB3      |                  |                |              |                 |               |
|                                                               | PGK1        |                  |                |              |                 |               |
|                                                               | PHACTR2     |                  |                |              |                 |               |
|                                                               | PHLDA1      |                  |                |              |                 |               |
|                                                               | PHPT1       |                  |                |              |                 |               |
|                                                               | PHTF2       |                  |                |              |                 |               |
|                                                               | PIM3        |                  |                |              |                 |               |
|                                                               | PKM         |                  |                |              |                 |               |
|                                                               | PLTP        |                  |                |              |                 |               |
|                                                               | PMAIP1      |                  |                |              |                 |               |
|                                                               | PMF1        |                  |                |              |                 |               |
|                                                               | PMF1-BGLAP  |                  |                |              |                 |               |
|                                                               | PPP1CB      |                  |                |              |                 |               |
|                                                               | PRDM1       |                  |                |              |                 |               |
|                                                               | PRDX1       |                  |                |              |                 |               |
|                                                               | PRDX3       |                  |                |              |                 |               |
|                                                               | PRDX5       |                  |                |              |                 |               |
|                                                               | PRF1        |                  |                |              |                 |               |
|                                                               | PRKAR1A     |                  |                |              |                 |               |
|                                                               | PRNP        |                  |                |              |                 |               |
|                                                               | PTP4A1      |                  |                |              |                 |               |
|                                                               | PTP4A3      |                  |                |              |                 |               |
|                                                               | PTPN22      |                  |                |              |                 |               |
|                                                               | PTPN7       |                  |                |              |                 |               |
|                                                               | PTTG1       |                  |                |              |                 |               |
|                                                               | RAB10       |                  |                |              |                 |               |
|                                                               | RAB11FIP1   |                  |                |              |                 |               |
|                                                               | RAB8B       |                  |                |              |                 |               |
|                                                               | RALGDS      |                  |                |              |                 |               |
|                                                               | RBPJ        |                  |                |              |                 |               |
|                                                               | RGS1        |                  |                |              |                 |               |
|                                                               | RHBDD2      |                  |                |              |                 |               |



**Table S6. Overlap of tumor-infiltrating Treg signatures with significantly upregulated genes in uTregs vs bTregs (% of overlapping genes/genes in signature).**

| Overlap between uTregs and tumor-infiltrating Treg signatures |             |                  |                |              |                 |               |
|---------------------------------------------------------------|-------------|------------------|----------------|--------------|-----------------|---------------|
| Tirosh et al                                                  | Zheng et al | De Simone et al. | Pacella et al. | Toker et al. | Magnuson et al. | Plitas et al. |
|                                                               | RHOC        |                  |                |              |                 |               |
|                                                               | RNF19A      |                  |                |              |                 |               |
|                                                               | RPS27L      |                  |                |              |                 |               |
|                                                               | SAMSN1      |                  |                |              |                 |               |
|                                                               | SAT1        |                  |                |              |                 |               |
|                                                               | SCO2        |                  |                |              |                 |               |
|                                                               | SDC4        |                  |                |              |                 |               |
|                                                               | SDF4        |                  |                |              |                 |               |
|                                                               | SERPINE2    |                  |                |              |                 |               |
|                                                               | SFT2D1      |                  |                |              |                 |               |
|                                                               | SH2D2A      |                  |                |              |                 |               |
|                                                               | SKAP2       |                  |                |              |                 |               |
|                                                               | SLA         |                  |                |              |                 |               |
|                                                               | SLAMF1      |                  |                |              |                 |               |
|                                                               | SLC16A1     |                  |                |              |                 |               |
|                                                               | SLC3A2      |                  |                |              |                 |               |
|                                                               | SLC5A3      |                  |                |              |                 |               |
|                                                               | SNX9        |                  |                |              |                 |               |
|                                                               | SPATS2L     |                  |                |              |                 |               |
|                                                               | SPPL2A      |                  |                |              |                 |               |
|                                                               | SQSTM1      |                  |                |              |                 |               |
|                                                               | SRA1        |                  |                |              |                 |               |
|                                                               | SRGN        |                  |                |              |                 |               |
|                                                               | STAT3       |                  |                |              |                 |               |
|                                                               | SURF4       |                  |                |              |                 |               |
|                                                               | SYT11       |                  |                |              |                 |               |
|                                                               | TANK        |                  |                |              |                 |               |
|                                                               | TFRC        |                  |                |              |                 |               |
|                                                               | THADA       |                  |                |              |                 |               |
|                                                               | TMCO1       |                  |                |              |                 |               |
|                                                               | TMEM173     |                  |                |              |                 |               |
|                                                               | TMEM50A     |                  |                |              |                 |               |
|                                                               | TMX1        |                  |                |              |                 |               |
|                                                               | TNFAIP3     |                  |                |              |                 |               |
|                                                               | TNFRSF13B   |                  |                |              |                 |               |
|                                                               | TNFRSF18    |                  |                |              |                 |               |
|                                                               | TNFRSF1B    |                  |                |              |                 |               |
|                                                               | TNFRSF4     |                  |                |              |                 |               |
|                                                               | TNFRSF9     |                  |                |              |                 |               |
|                                                               | TNIP3       |                  |                |              |                 |               |
|                                                               | TOX2        |                  |                |              |                 |               |
|                                                               | TPI1        |                  |                |              |                 |               |
|                                                               | TPM4        |                  |                |              |                 |               |
|                                                               | TPP1        |                  |                |              |                 |               |
|                                                               | TRAF1       |                  |                |              |                 |               |
|                                                               | TRAF3       |                  |                |              |                 |               |
|                                                               | TRPS1       |                  |                |              |                 |               |
|                                                               | TSPAN13     |                  |                |              |                 |               |
|                                                               | TSPYL2      |                  |                |              |                 |               |
|                                                               | TYMP        |                  |                |              |                 |               |
|                                                               | UBASH3B     |                  |                |              |                 |               |
|                                                               | VDR         |                  |                |              |                 |               |
|                                                               | VMP1        |                  |                |              |                 |               |
|                                                               | ZBED2       |                  |                |              |                 |               |
|                                                               | ZBTB32      |                  |                |              |                 |               |
|                                                               | ZFP36L1     |                  |                |              |                 |               |

**Table S7. Genes most often shared between 7 tumor-infiltrating Treg signatures**

| <i>Name</i> | <i># Signatures shared</i> | <i>DE<sup>pb</sup>uTreg vs bTreg?</i> | <i>DE<sup>pb</sup>uTreg vs<sup>inc</sup>Treg?</i> | <i>In uTreg core?</i> |
|-------------|----------------------------|---------------------------------------|---------------------------------------------------|-----------------------|
| IL1R2       | 7                          | Yes                                   | No                                                | Yes                   |
| TNFRSF1B    | 6                          | Yes                                   | Yes                                               | Yes                   |
| CTSC        | 6                          | Yes                                   | Yes                                               | Yes                   |
| LAPTM4B     | 6                          | Yes                                   | No                                                | Yes                   |
| DPYSL2      | 6                          | Yes                                   | No                                                | Yes                   |
| CREB3L2     | 6                          | Yes                                   | No                                                | No                    |
| ICOS        | 6                          | Yes                                   | No                                                | No                    |
| CCR8        | 6                          | No                                    | No                                                | No                    |
| CSF2RB      | 6                          | No                                    | No                                                | No                    |
| GLRX        | 6                          | No                                    | No                                                | No                    |
| MAGEH1      | 6                          | No                                    | No                                                | No                    |
| ENTPD1      | 5                          | Yes                                   | Yes                                               | Yes                   |
| IL2RA       | 5                          | Yes                                   | Yes                                               | Yes                   |
| NCF4        | 5                          | Yes                                   | Yes                                               | Yes                   |
| SDC4        | 5                          | Yes                                   | Yes                                               | Yes                   |
| TNFRSF4     | 5                          | Yes                                   | Yes                                               | Yes                   |
| CRADD       | 5                          | Yes                                   | No                                                | Yes                   |
| LAYN        | 5                          | Yes                                   | No                                                | Yes                   |
| TNFRSF18    | 5                          | Yes                                   | No                                                | Yes                   |
| BCL2L1      | 5                          | Yes                                   | Yes                                               | No                    |
| GCNT1       | 5                          | Yes                                   | No                                                | No                    |
| TIGIT       | 5                          | No                                    | Yes                                               | No                    |
| EBI3        | 5                          | No                                    | No                                                | No                    |
| F5          | 5                          | No                                    | No                                                | No                    |
| FOXP3       | 5                          | No                                    | No                                                | No                    |
| GBP2        | 5                          | No                                    | No                                                | No                    |
| IKZF2       | 5                          | No                                    | No                                                | No                    |
| IL12RB2     | 5                          | No                                    | No                                                | No                    |
| TBC1D8      | 5                          | No                                    | No                                                | No                    |
| ACP5        | 4                          | Yes                                   | Yes                                               | Yes                   |
| BATF        | 4                          | Yes                                   | Yes                                               | Yes                   |
| ERI1        | 4                          | Yes                                   | Yes                                               | Yes                   |
| NAMPT       | 4                          | Yes                                   | Yes                                               | Yes                   |
| PTTG1       | 4                          | Yes                                   | Yes                                               | Yes                   |
| TFRC        | 4                          | Yes                                   | Yes                                               | Yes                   |
| TPP1        | 4                          | Yes                                   | Yes                                               | Yes                   |
| VDR         | 4                          | Yes                                   | Yes                                               | Yes                   |
| CD80        | 4                          | Yes                                   | No                                                | Yes                   |
| COL9A2      | 4                          | Yes                                   | No                                                | Yes                   |
| IKZF4       | 4                          | Yes                                   | No                                                | Yes                   |
| IL1R1       | 4                          | Yes                                   | No                                                | Yes                   |
| KAT2B       | 4                          | Yes                                   | No                                                | Yes                   |
| LTA         | 4                          | Yes                                   | No                                                | Yes                   |
| PTP4A3      | 4                          | Yes                                   | No                                                | Yes                   |
| TNFRSF9     | 4                          | Yes                                   | No                                                | Yes                   |
| ZBED2       | 4                          | Yes                                   | No                                                | Yes                   |
| MRPS6       | 4                          | Yes                                   | Yes                                               | No                    |
| SLAMF1      | 4                          | Yes                                   | Yes                                               | No                    |
| ARHGEF12    | 4                          | Yes                                   | No                                                | No                    |
| CCND2       | 4                          | Yes                                   | No                                                | No                    |
| CD7         | 4                          | Yes                                   | No                                                | No                    |
| CD79B       | 4                          | Yes                                   | No                                                | No                    |
| HTATIP2     | 4                          | No                                    | Yes                                               | No                    |
| CARD16      | 4                          | No                                    | Yes                                               | No                    |
| SIRPG       | 4                          | No                                    | Yes                                               | No                    |
| DFNB31      | 4                          | No                                    | No                                                | No                    |
| DUSP16      | 4                          | No                                    | No                                                | No                    |
| FCRL3       | 4                          | No                                    | No                                                | No                    |
| FLVCR2      | 4                          | No                                    | No                                                | No                    |
| GBP5        | 4                          | No                                    | No                                                | No                    |
| MYO5C       | 4                          | No                                    | No                                                | No                    |
| SYNGR2      | 4                          | No                                    | No                                                | No                    |
| TMPRSS6     | 4                          | No                                    | No                                                | No                    |
| UGP2        | 4                          | No                                    | No                                                | No                    |
